# Supplementary material for: Asymmetric allylation of sulfonyl imines catalyzed by in situ generated Cu(ii) complexes of chiral amino alcohol based Schiff bases
Source: Royal Society of Chemistry journal article supplement (doi:10.1039/c4ra10929e), 2014-01-01
Supplement: c4ra10929e1.pdf [file c4ra10929e1.pdf]

## Supplementary Information

### Asymmetric Allylation of Sulfonyl Imines Catalyzed by *in situ* Generated Cu(II) Complexes of Chiral Amino Alcohol Based Schiff Bases

Debashis Ghosh,<sup>a</sup> Prasanta Kumar Bera,<sup>a</sup> Manish Kumar,<sup>a</sup> Sayed H. R. Abdi,<sup>\*a</sup> Noor-ul H. Khan,<sup>a</sup> Rukhsana I. Kureshy<sup>a</sup> and Hari C. Bajaj<sup>a</sup>

<sup>a</sup>Discipline of Inorganic Materials and Catalysis, Central Salt and Marine Chemicals Research Institute (CSMCRI), Council of Scientific & Industrial Research (CSIR), G. B. Marg, Bhavnagar-364 002, Gujarat, India. Fax: (+91) 0278-2566970. E-mail: [shrabdi@csmcri.org](mailto:shrabdi@csmcri.org)

<sup>b</sup>Academy of Scientific and Innovative Research, CSIR-Central Salt and Marine Chemicals Research Institute (CSIR-CSMCRI), G. B. Marg, Bhavnagar- 364 002, Gujarat, India

#### Content

|                                                                                                                                                                             | Pages   |
|-----------------------------------------------------------------------------------------------------------------------------------------------------------------------------|---------|
| General                                                                                                                                                                     | S1      |
| ESI-MS spectral analysis for the interaction of <i>in situ</i> generated catalyst (Cu <sub>2</sub> -( <i>S,S</i> )- <b>2</b> ) with L-tert-leucinol and substrate <b>1b</b> | S2      |
| HPLC chromatogram of the products                                                                                                                                           | S3-S17  |
| Copy of <sup>1</sup> H and <sup>13</sup> C spectra of the ligand ( <i>S,S</i> )- <b>2'</b>                                                                                  | S18     |
| Copy of <sup>1</sup> H and <sup>13</sup> C spectra of the products                                                                                                          | S19-S33 |
| Copy of <sup>1</sup> H and <sup>13</sup> C spectra the $\beta$ -amino acid                                                                                                  | S34     |
| References                                                                                                                                                                  | S35     |

#### General

Different aldehydes and reagents were used as received. The imine substrates (**1a-1o**) were prepared following literature procedure.<sup>1</sup> All the solvents used in the present study were dried by known purification technique.<sup>2</sup> NMR spectra were obtained with a Bruker F113V spectrometer (500 MHz / 200 MHz) and are referenced internally with TMS. Splitting patterns were reported as s, singlet; d, doublet; dd, doublet of doublet; t, triplet; q, quartet; m, multiplet; br, broad. Enantiomeric excess (ee) were determined by HPLC using Daicel Chiralpak OD-H, AS-H and IA, chiral columns with 2-propanol/hexane as eluent. FTIR spectra were carried out using KBr. Optical rotations were determined by automatic polarimeter. For the product purification flash chromatography was performed using silica gel 100-200 mesh.

**ESI-MS spectral analysis for the interaction of *in situ* generated catalyst (Cu<sub>2</sub>-L) with L-tert-leucinol and substrate 1b**

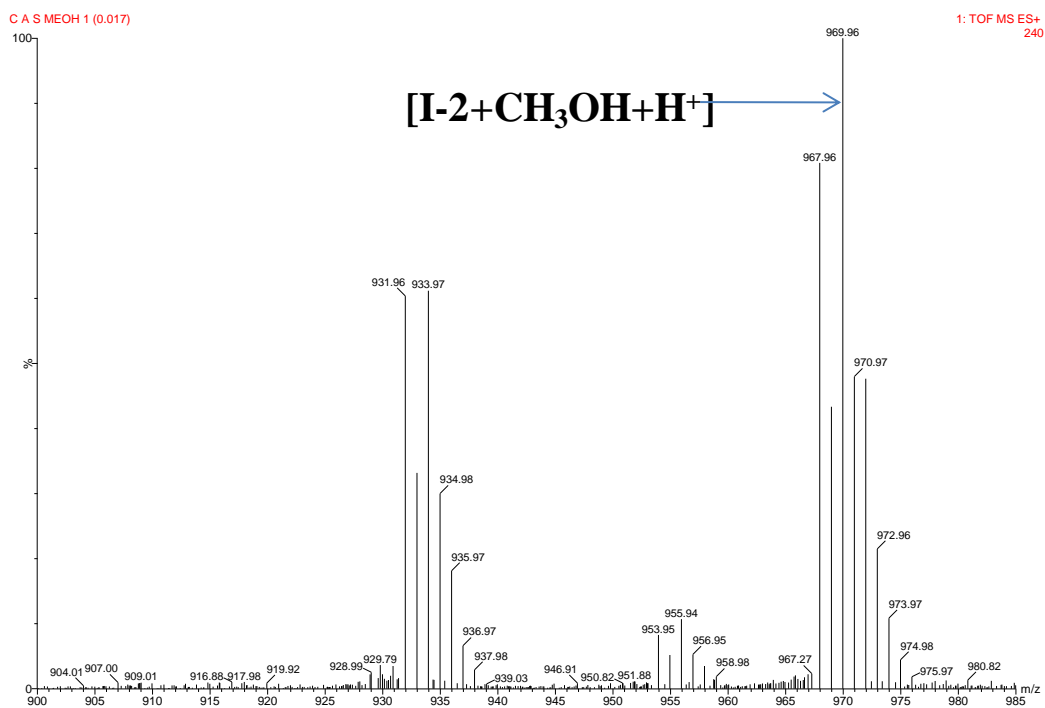

**Figure 1** ESI-MS spectrum of the *in situ* generated complex after addition of L-tert-leucinol and substrate (**1c**) was recorded in methanol.

**Copy of HPLC chromatogram of the products 2a-2p**

***N*-(1-Phenylbut-3-enyl)-4-methylbenzenesulfonamide 2a**

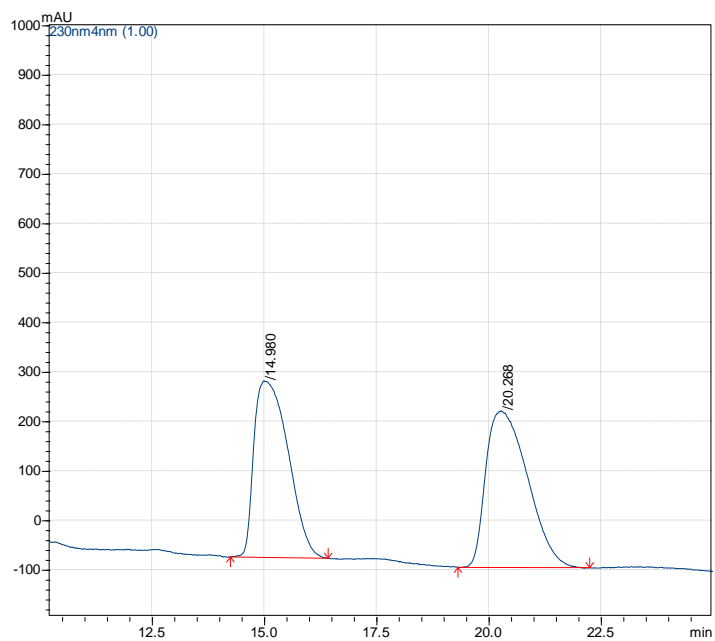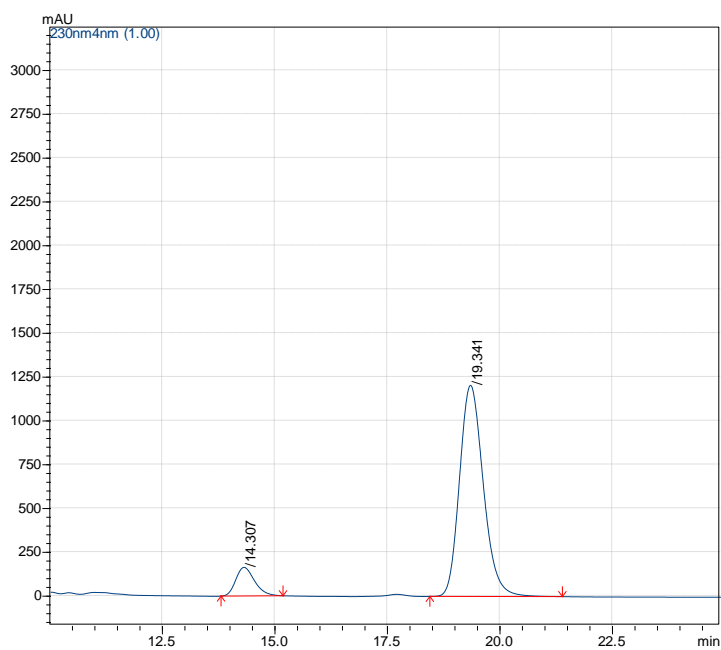

| Peak# | Ret. Time | Area     | Peak Start | Peak End | Area%   |
|-------|-----------|----------|------------|----------|---------|
| 1     | 14.980    | 18904257 | 14.240     | 16.416   | 48.0460 |
| 2     | 20.268    | 20441876 | 19.307     | 22.240   | 51.9540 |

| Peak# | Ret. Time | Area     | Peak Start | Peak End | Area%   |
|-------|-----------|----------|------------|----------|---------|
| 1     | 14.307    | 4747693  | 13.803     | 15.179   | 9.6709  |
| 2     | 19.341    | 44344728 | 18.443     | 21.387   | 90.3291 |

***N*-(1-(4-Chlorophenyl)but-3-enyl)-4-methylbenzenesulfonamide 2b**

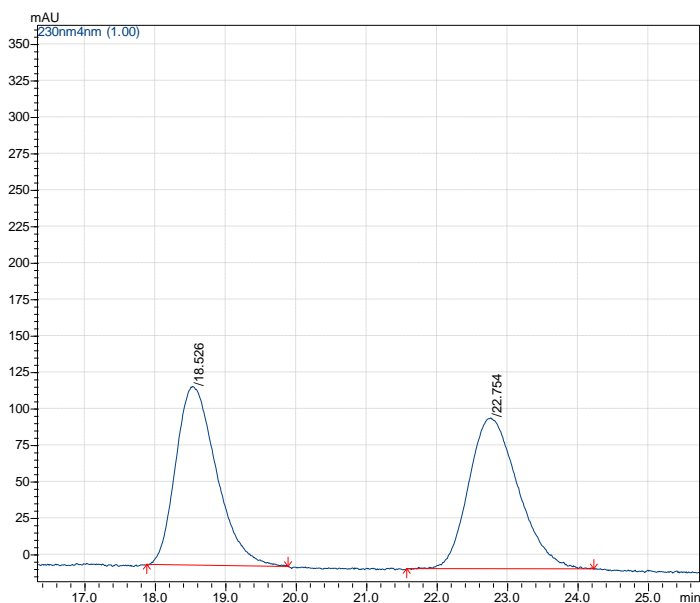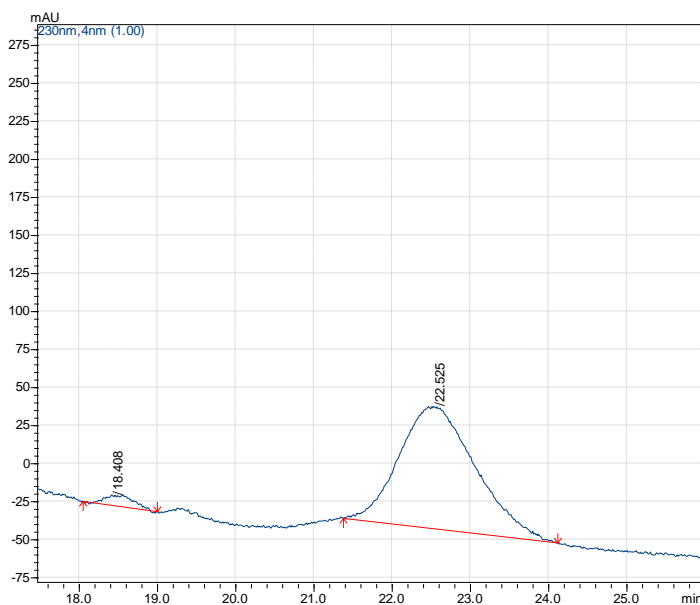

| Peak# | Ret. Time | Area    | Peak Start | Peak End | Area%   |
|-------|-----------|---------|------------|----------|---------|
| 1     | 18.526    | 4918321 | 17.877     | 19.883   | 49.4156 |
| 2     | 22.754    | 5034659 | 21.568     | 24.224   | 50.5844 |

| Peak# | Ret. Time | Area    | Peak Start | Peak End | Area%   |
|-------|-----------|---------|------------|----------|---------|
| 1     | 18.408    | 176931  | 18.048     | 18.997   | 3.1429  |
| 2     | 22.525    | 5452672 | 21.376     | 24.117   | 96.8571 |

***N*-1-(4-Chlorophenyl)but-3-enyl)benzenesulfonamide 2c**

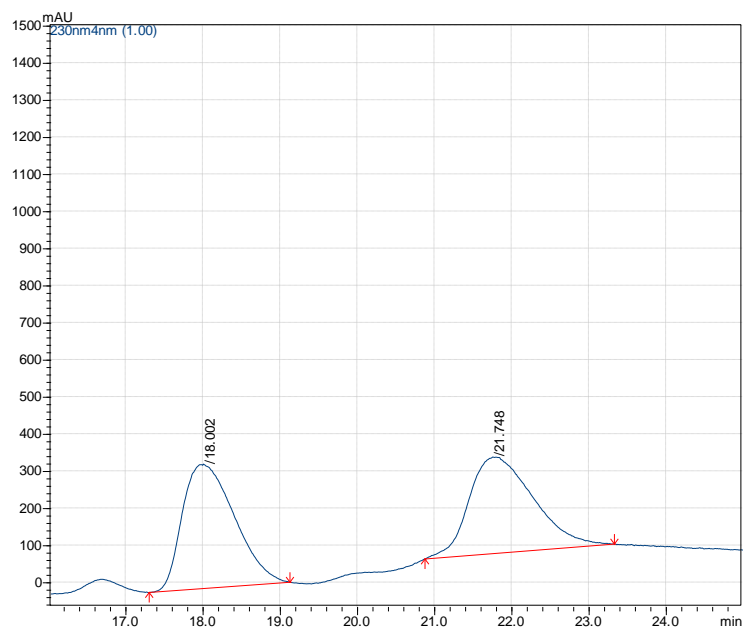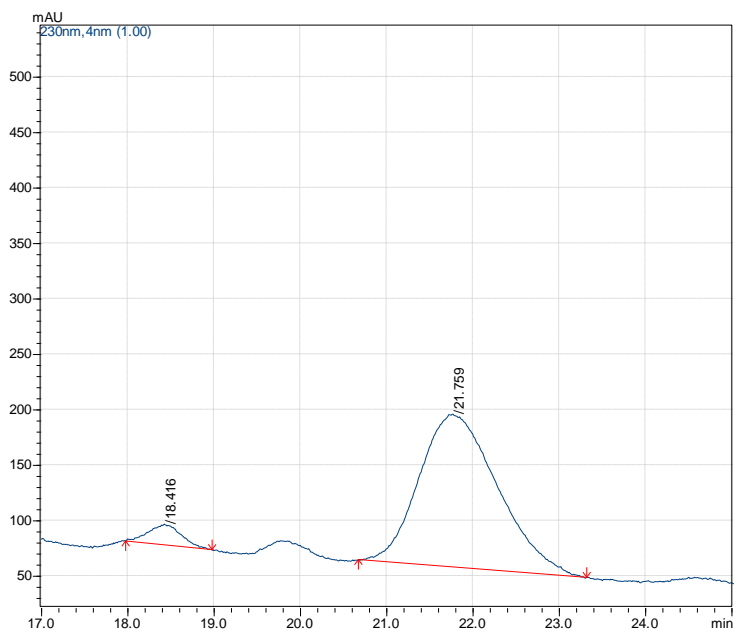

| Peak# | Ret. Time | Area     | Peak Start | Peak End | Area%   |
|-------|-----------|----------|------------|----------|---------|
| 1     | 18.002    | 15714207 | 17.301     | 19.125   | 51.0605 |
| 2     | 21.748    | 15061465 | 20.875     | 23.328   | 48.9395 |

| Peak# | Ret. Time | Area    | Peak Start | Peak End | Area%   |
|-------|-----------|---------|------------|----------|---------|
| 1     | 18.416    | 486316  | 17.973     | 18.976   | 5.3053  |
| 2     | 21.759    | 8680221 | 20.672     | 23.317   | 94.6947 |

***N*-(1-(4-Chlorophenyl)but-3-enyl)-4-nitrobenzenesulfonamide 2d**

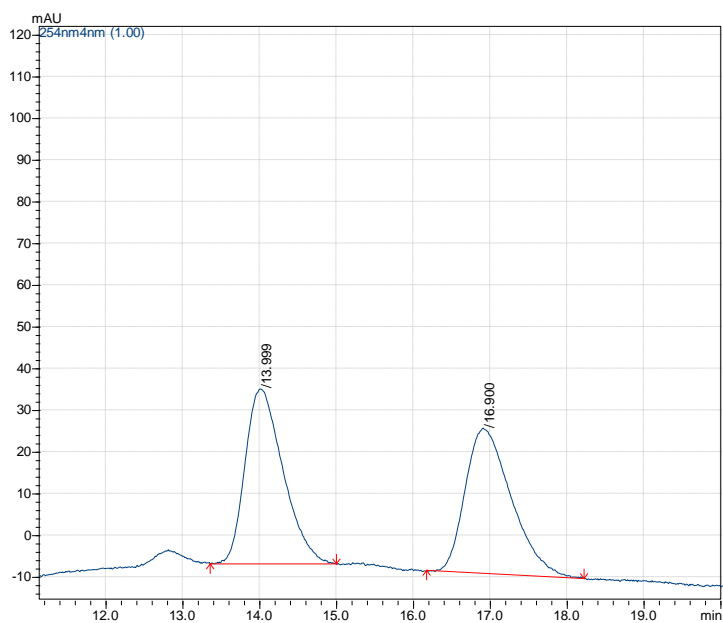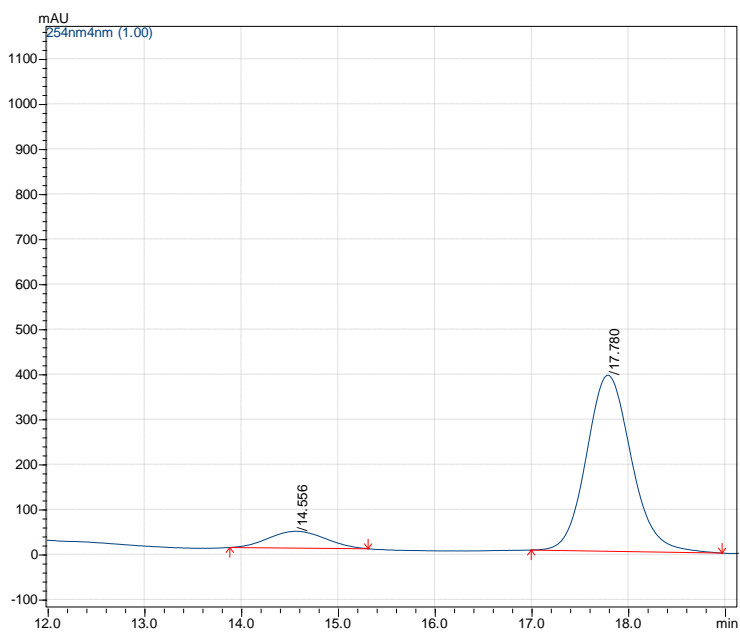

| Peak# | Ret. Time | Area    | Peak Start | Peak End | Area%   |
|-------|-----------|---------|------------|----------|---------|
| 1     | 13.999    | 1444488 | 13.355     | 14.997   | 49.9851 |
| 2     | 16.900    | 1445349 | 16.171     | 18.219   | 50.0149 |

| Peak# | Ret. Time | Area     | Peak Start | Peak End | Area%   |
|-------|-----------|----------|------------|----------|---------|
| 1     | 14.556    | 1515390  | 13.877     | 15.307   | 10.7374 |
| 2     | 17.780    | 12597803 | 16.992     | 18.965   | 89.2626 |

## N-(1-(4-Bromophenyl)but-3-enyl)benzenesulfonamide 2e

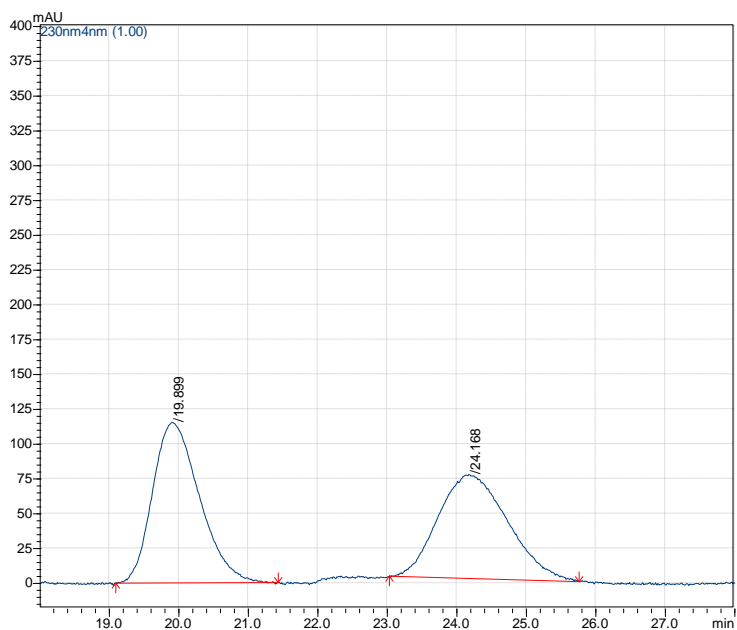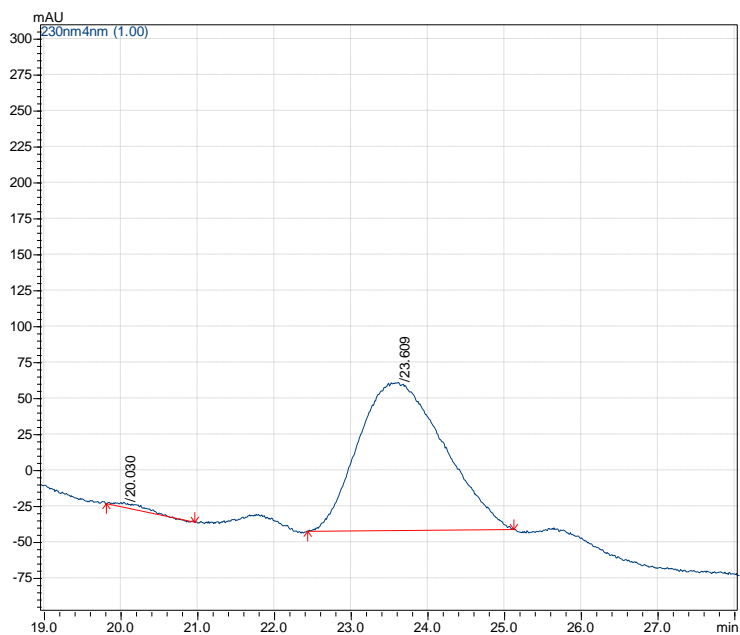

| Peak# | Ret. Time | Area    | Peak Start | Peak End | Area%   |
|-------|-----------|---------|------------|----------|---------|
| 1     | 19.899    | 5400492 | 19.093     | 21.429   | 51.0112 |
| 2     | 24.168    | 5186380 | 23.029     | 25.760   | 48.9888 |

| Peak# | Ret. Time | Area    | Peak Start | Peak End | Area%   |
|-------|-----------|---------|------------|----------|---------|
| 1     | 20.030    | 87212   | 19.808     | 20.960   | 1.0756  |
| 2     | 23.609    | 8020883 | 22.432     | 25.120   | 98.9244 |

**N-(1-(4-Fluorophenyl)but-3-enyl)-4-ethylbenzenesulfonamide 2f**

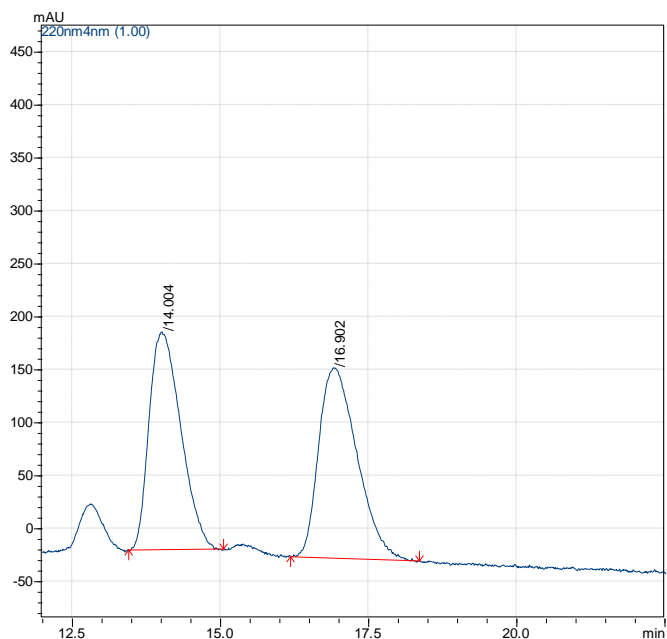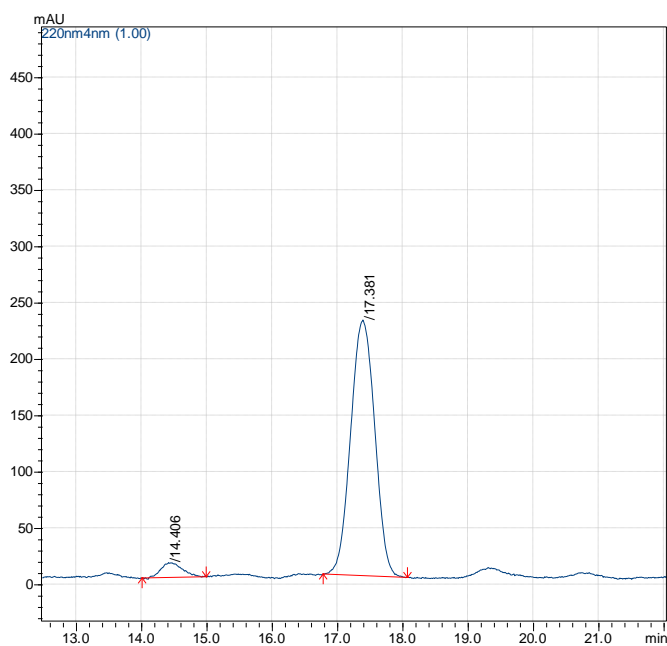

| Peak# | Ret. Time | Area    | Peak Start | Peak End | Area%   |
|-------|-----------|---------|------------|----------|---------|
| 1     | 14.004    | 7646345 | 13.451     | 15.051   | 48.5627 |
| 2     | 16.902    | 8098962 | 16.181     | 18.357   | 51.4373 |

| Peak# | Ret. Time | Area    | Peak Start | Peak End | Area%   |
|-------|-----------|---------|------------|----------|---------|
| 1     | 14.406    | 293718  | 14.005     | 14.987   | 4.8054  |
| 2     | 17.381    | 5818484 | 16.779     | 18.069   | 95.1946 |



***N*-(1-(4-Nitrophenyl)but-3-enyl)-4-methylbenzenesulfonamide 2g**

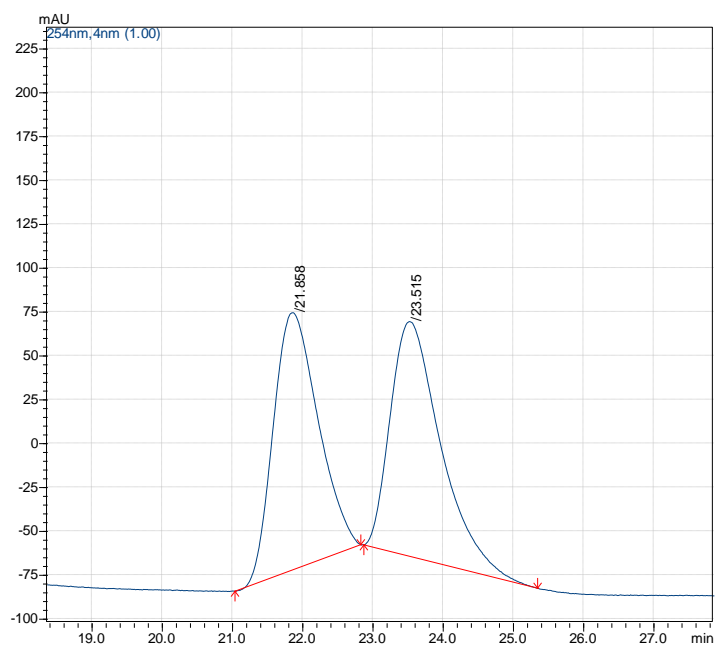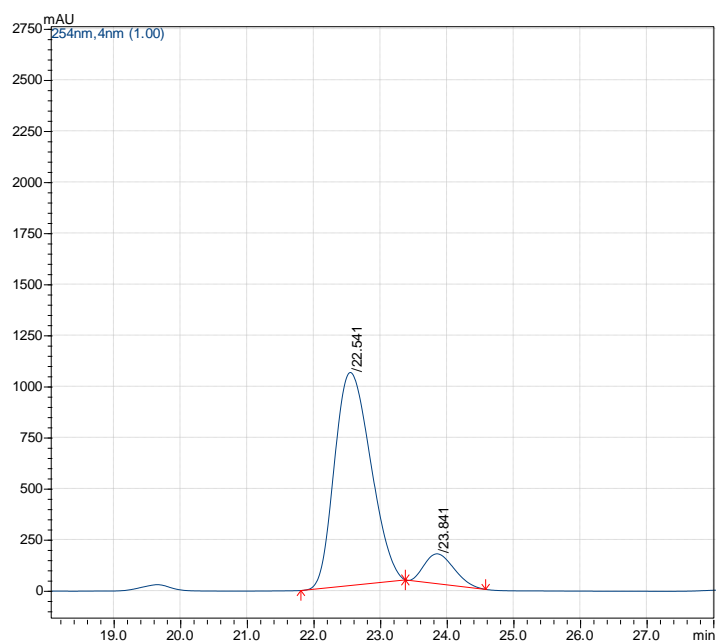

| Peak# | Ret. Time | Area    | Peak Start | Peak End | Area%   |
|-------|-----------|---------|------------|----------|---------|
| 1     | 21.858    | 6509707 | 21.035     | 22.827   | 49.3548 |
| 2     | 23.515    | 6679918 | 22.869     | 25.344   | 50.6452 |

| Peak# | Ret. Time | Area     | Peak Start | Peak End | Area%   |
|-------|-----------|----------|------------|----------|---------|
| 1     | 22.541    | 39401576 | 21.803     | 23.371   | 89.7496 |
| 2     | 23.841    | 4500113  | 23.371     | 24.576   | 10.2504 |

***N*-1-(4-Trifluoromethylphenyl)but-3-enyl)-4-methylbenzenesulfonamide 2h**

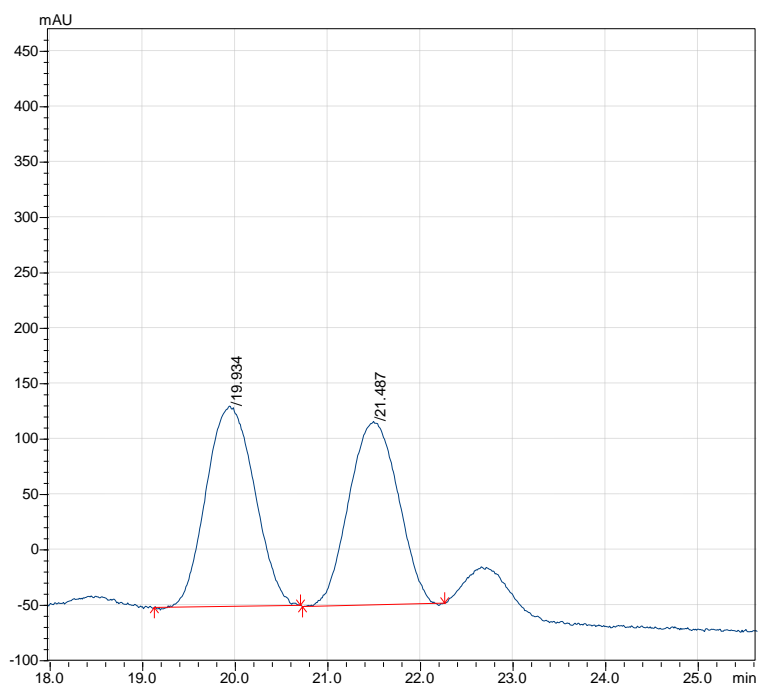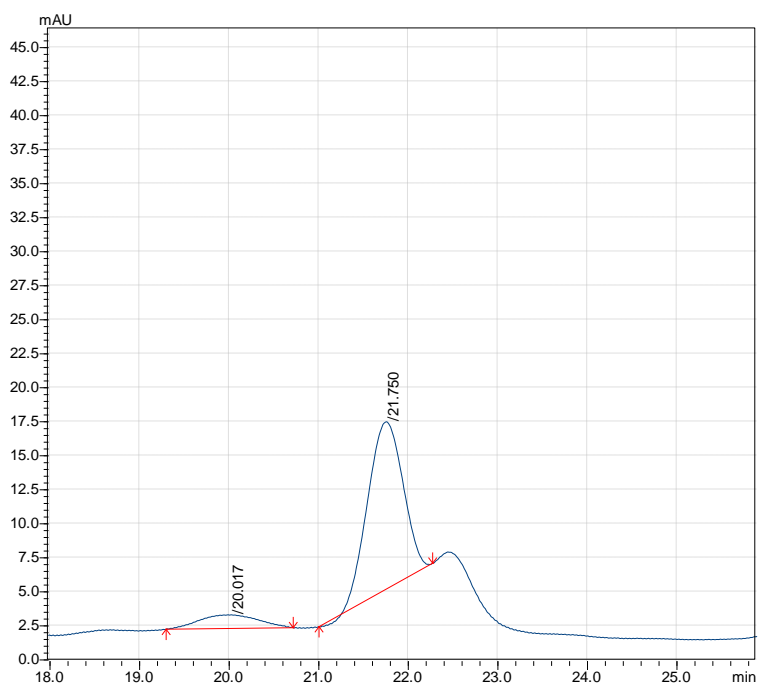

| Peak# | Ret. Time | Area    | Peak Start | Peak End | Area%   |
|-------|-----------|---------|------------|----------|---------|
| 1     | 19.934    | 6548244 | 19.125     | 20.704   | 51.7905 |
| 2     | 21.487    | 6095463 | 20.725     | 22.261   | 48.2095 |

| Peak# | Ret. Time | Area   | Peak Start | Peak End | Area%   |
|-------|-----------|--------|------------|----------|---------|
| 1     | 20.017    | 46250  | 19.296     | 20.715   | 12.0158 |
| 2     | 21.750    | 338659 | 21.003     | 22.272   | 87.9842 |

### N-(1-(4-Methoxyphenyl)but-3-enyl)benzenesulfonamide 2i

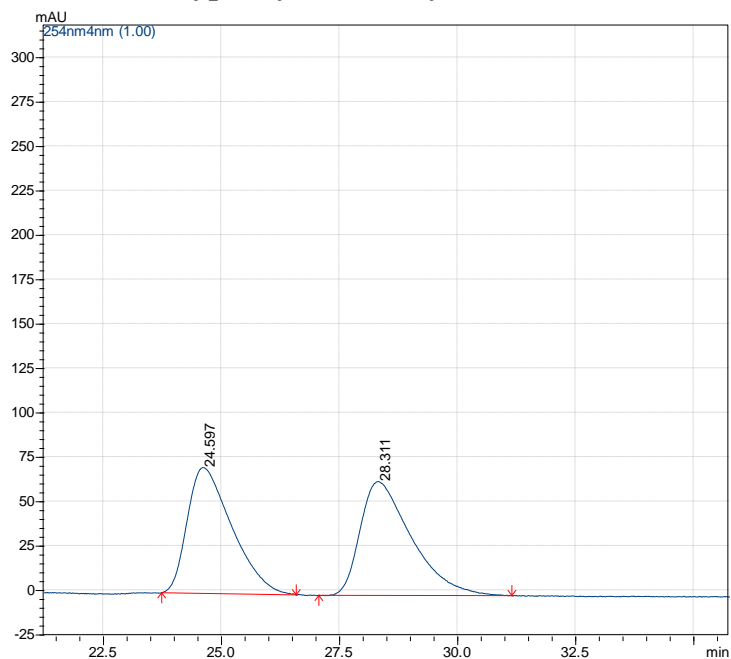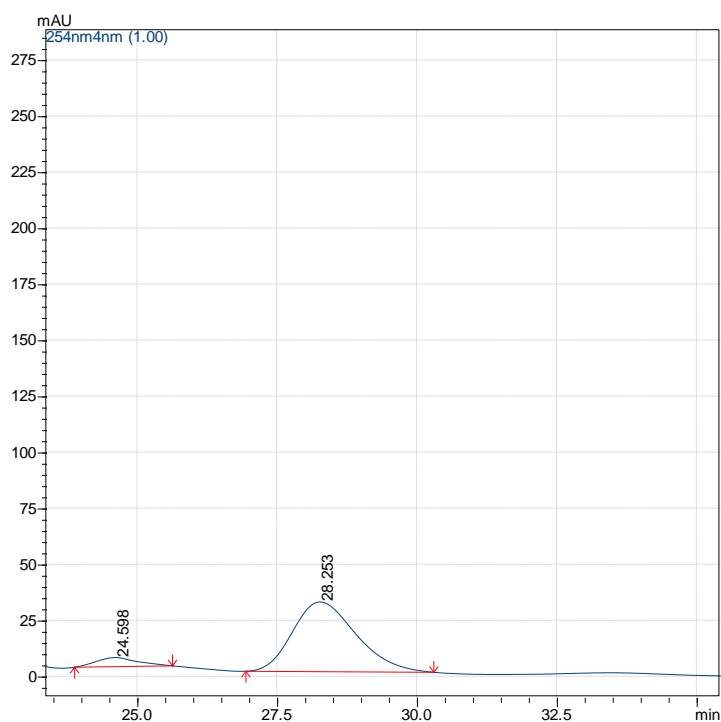

| Peak# | Ret. Time | Area    | Peak Start | Peak End | Area%   |
|-------|-----------|---------|------------|----------|---------|
| 1     | 24.597    | 4654983 | 23.733     | 26.581   | 49.0726 |
| 2     | 28.311    | 4830923 | 27.061     | 31.147   | 50.9274 |

| Peak# | Ret. Time | Area    | Peak Start | Peak End | Area%   |
|-------|-----------|---------|------------|----------|---------|
| 1     | 24.598    | 209625  | 23.872     | 25.621   | 7.8605  |
| 2     | 28.253    | 2457172 | 26.933     | 30.293   | 92.1395 |

***N*-(1-(3-Chlorophenyl)but-3-enyl)-4-methylbenzenesulfonamide 2j**

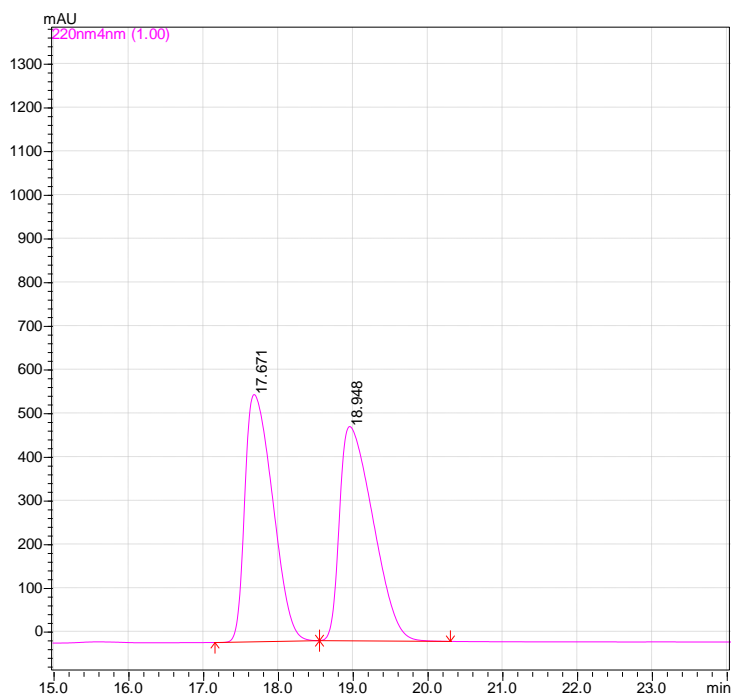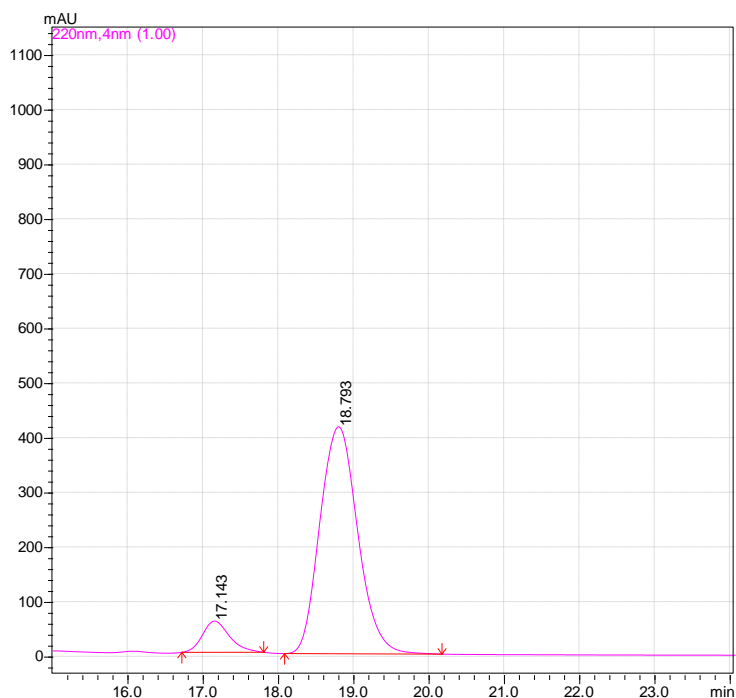

| Peak# | Ret. Time | Area     | Peak Start | Peak End | Area%   |
|-------|-----------|----------|------------|----------|---------|
| 1     | 17.671    | 14621781 | 17.152     | 18.549   | 48.9527 |
| 2     | 18.948    | 15247409 | 18.549     | 20.299   | 51.0473 |

| Peak# | Ret. Time | Area     | Peak Start | Peak End | Area%   |
|-------|-----------|----------|------------|----------|---------|
| 1     | 17.143    | 1426400  | 16.715     | 17.803   | 8.9628  |
| 2     | 18.793    | 14488260 | 18.080     | 20.171   | 91.0372 |

**N-(1-(2-Chlorophenyl)but-3-enyl)-4-methylbenzenesulfonamide 2k**

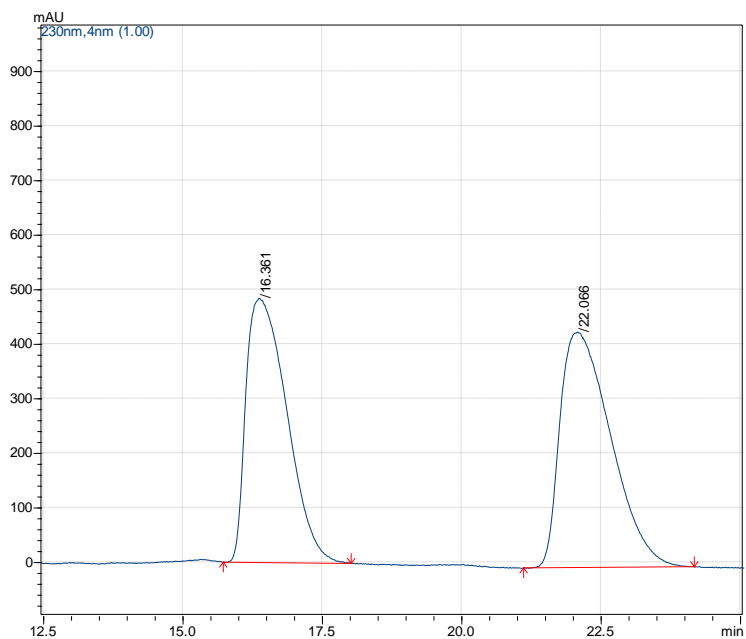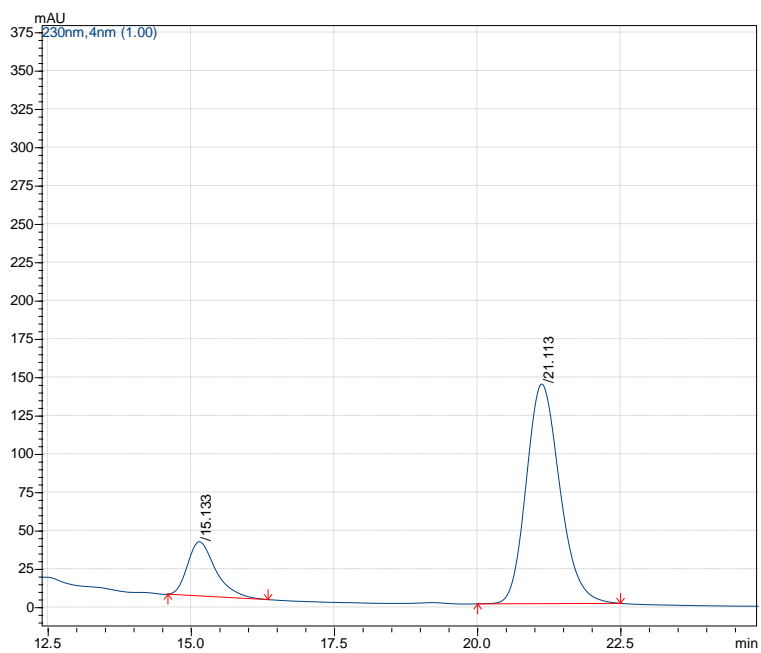

| Peak# | Ret. Time | Area     | Peak Start | Peak End | Area%   |
|-------|-----------|----------|------------|----------|---------|
| 1     | 16.361    | 24732814 | 15.723     | 18.016   | 47.5085 |
| 2     | 22.066    | 27326946 | 21.109     | 24.171   | 52.4915 |

| Peak# | Ret. Time | Area    | Peak Start | Peak End | Area%   |
|-------|-----------|---------|------------|----------|---------|
| 1     | 15.133    | 1205239 | 14.592     | 16.341   | 17.0976 |
| 2     | 21.113    | 5843929 | 20.000     | 22.496   | 82.9024 |

## N-(1-(2-Fluorophenyl)but-3-enyl)-4-methylbenzenesulfonamide 2l

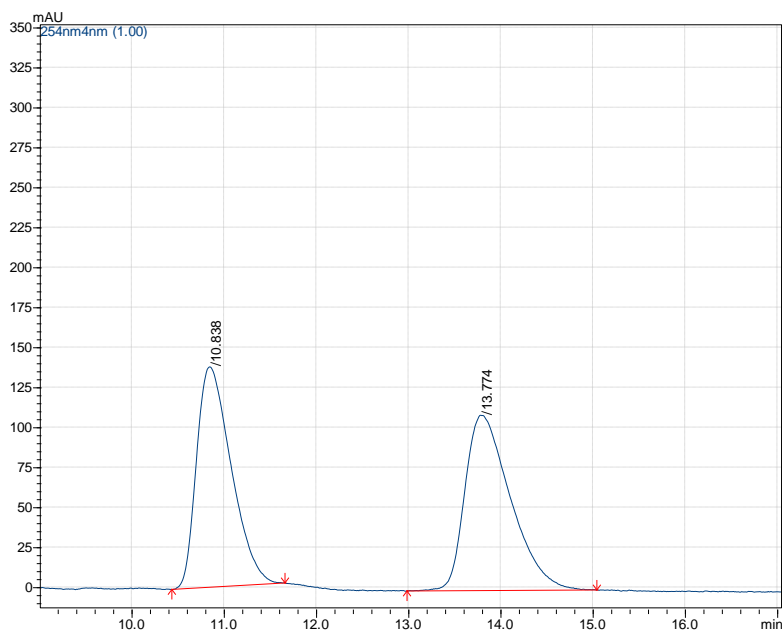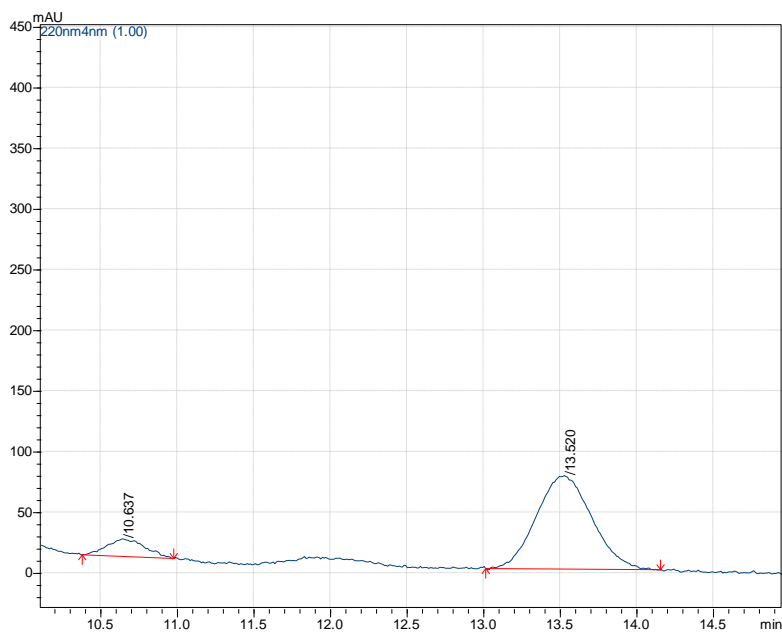

| Peak# | Ret. Time | Area    | Peak Start | Peak End | Area%   |
|-------|-----------|---------|------------|----------|---------|
| 1     | 10.838    | 3602505 | 10.432     | 11.659   | 48.8919 |
| 2     | 13.774    | 3765803 | 12.981     | 15.040   | 51.1081 |

| Peak# | Ret. Time | Area    | Peak Start | Peak End | Area%   |
|-------|-----------|---------|------------|----------|---------|
| 1     | 10.637    | 249989  | 10.379     | 10.976   | 11.4401 |
| 2     | 13.520    | 1935212 | 13.013     | 14.155   | 88.5599 |

**N-(1-(1-Naphthyl)but-3-enyl)-4-methylbenzenesulfonamide 2m**

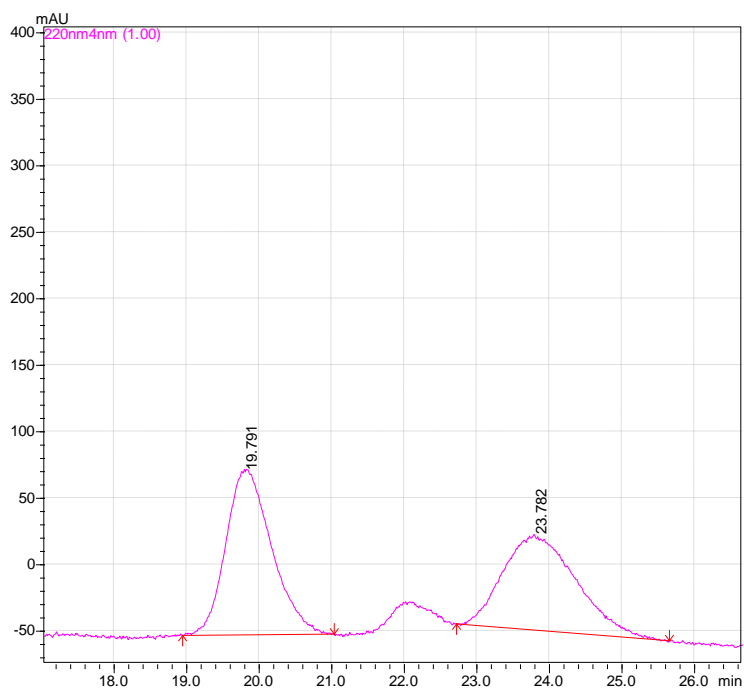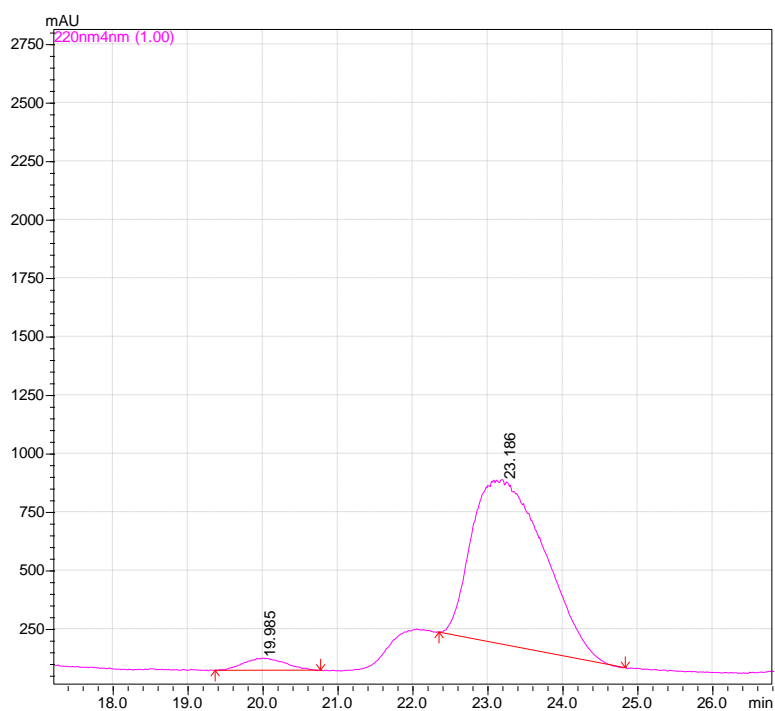

| Peak# | Ret. Time | Area    | Peak Start | Peak End | Area%   |
|-------|-----------|---------|------------|----------|---------|
| 1     | 19.791    | 5457558 | 18.944     | 21.035   | 52.2180 |
| 2     | 23.782    | 4993929 | 22.720     | 25.653   | 47.7820 |

| Peak# | Ret. Time | Area     | Peak Start | Peak End | Area%   |
|-------|-----------|----------|------------|----------|---------|
| 1     | 19.985    | 1978657  | 19.360     | 20.768   | 3.9929  |
| 2     | 23.186    | 47575321 | 22.347     | 24.832   | 96.0071 |

## N-(1-(2-Naphthyl)but-3-enyl)-4-methylbenzenesulfonamide 2n

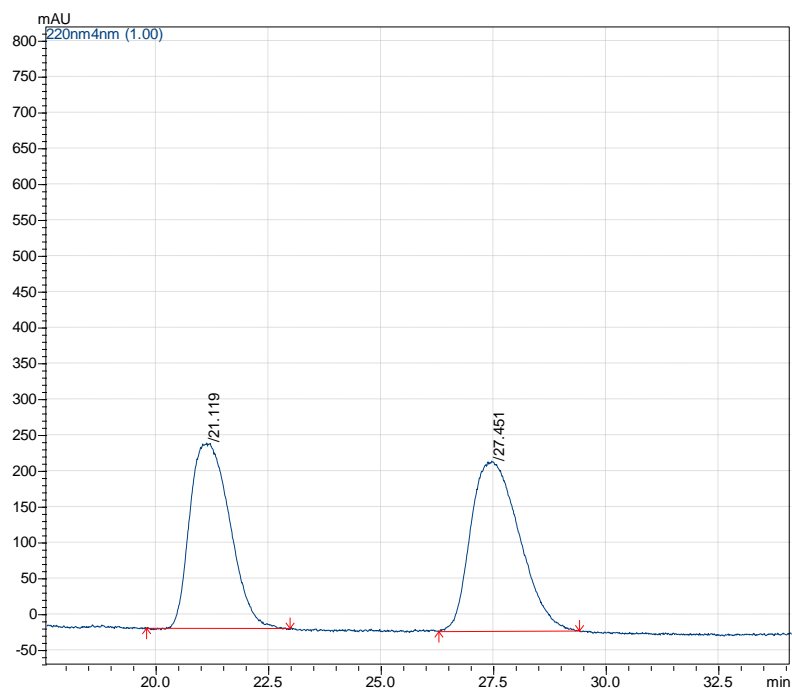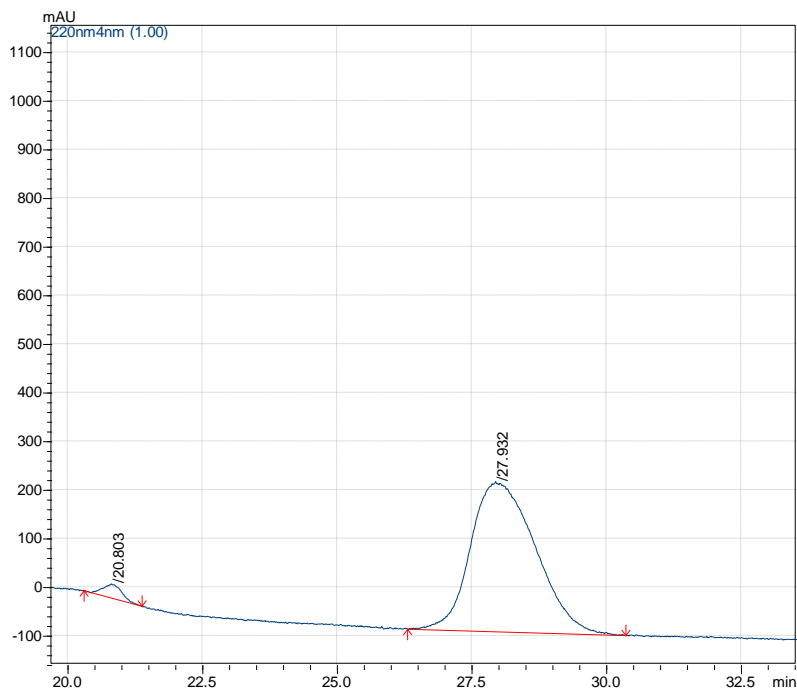

| Peak# | Ret. Time | Area     | Peak Start | Peak End | Area%   |
|-------|-----------|----------|------------|----------|---------|
| 1     | 21.119    | 15938208 | 19.787     | 22.976   | 47.1301 |
| 2     | 27.451    | 17879230 | 26.283     | 29.408   | 52.8699 |

| Peak# | Ret. Time | Area     | Peak Start | Peak End | Area%   |
|-------|-----------|----------|------------|----------|---------|
| 1     | 20.803    | 697514   | 20.299     | 21.376   | 2.6283  |
| 2     | 27.932    | 25841109 | 26.304     | 30.357   | 97.3717 |



**(E)-N-(1-Phenylhexa-1,5-diene-3-yl)-4-methylbenzenesulfonamide 2o**

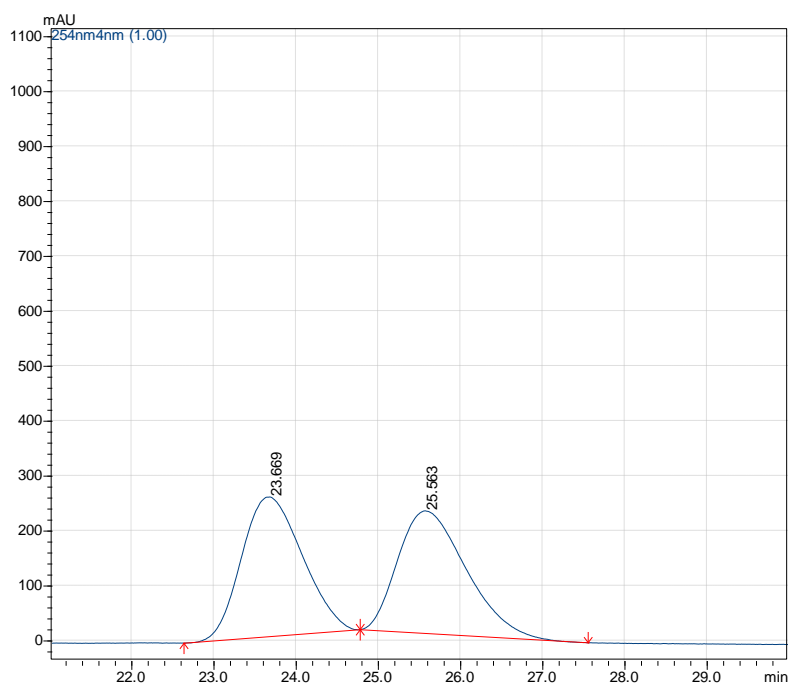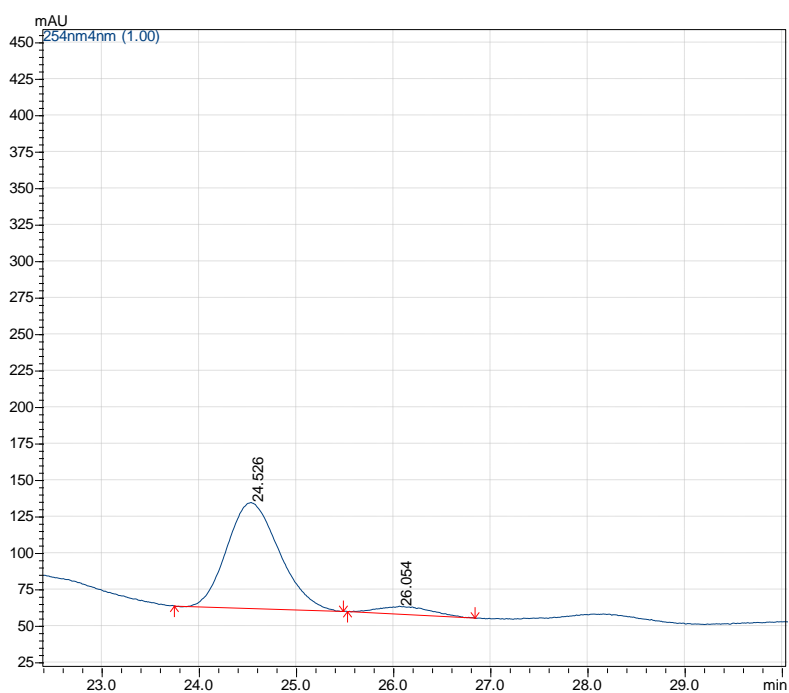

| Peak# | Ret. Time | Area     | Peak Start | Peak End | Area%   |
|-------|-----------|----------|------------|----------|---------|
| 1     | 23.669    | 13081329 | 22.635     | 24.779   | 50.3257 |
| 2     | 25.563    | 12912029 | 24.779     | 27.552   | 49.6743 |

| Peak# | Ret. Time | Area    | Peak Start | Peak End | Area%   |
|-------|-----------|---------|------------|----------|---------|
| 1     | 24.526    | 2725395 | 23.744     | 25.483   | 93.1427 |
| 2     | 26.054    | 200648  | 25.525     | 26.837   | 6.8573  |

**(E)-N-(2-methyl-1-phenylhexa-1,5-dien-3-yl)-4-methyl-benzenesulfonamide 2p**

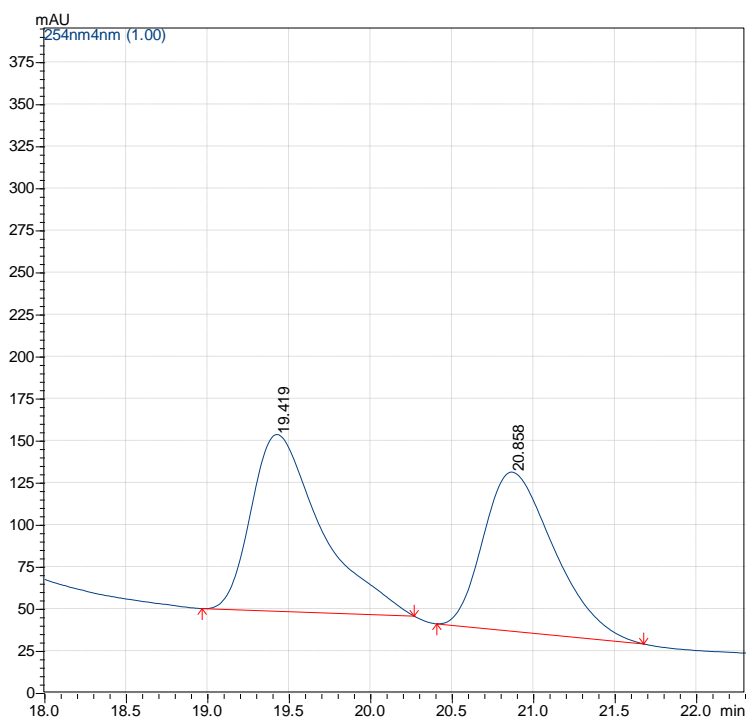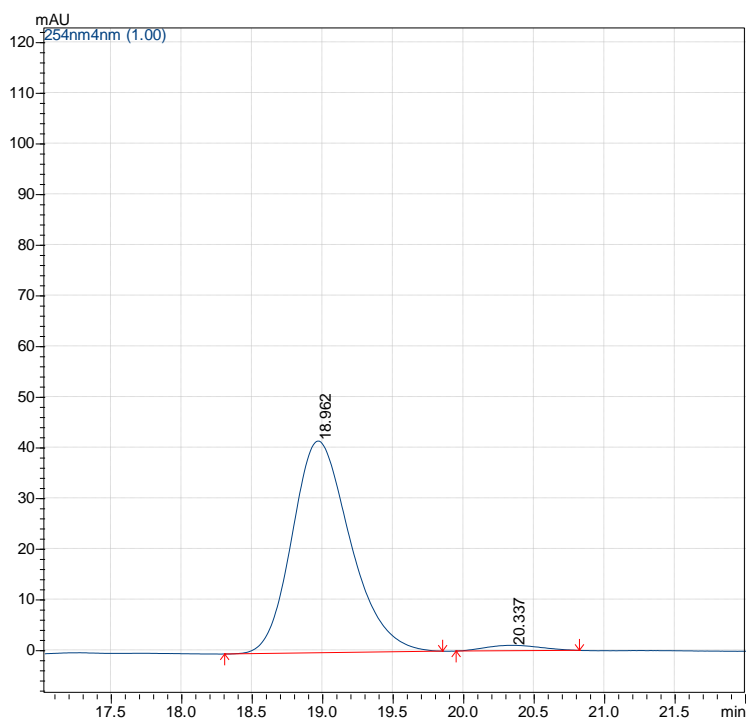

| Peak# | Ret. Time | Area    | Peak Start | Peak End | Area%   |
|-------|-----------|---------|------------|----------|---------|
| 1     | 19.419    | 3141571 | 18.965     | 20.267   | 52.3333 |
| 2     | 20.858    | 2861438 | 20.405     | 21.675   | 47.6667 |

| Peak# | Ret. Time | Area    | Peak Start | Peak End | Area%   |
|-------|-----------|---------|------------|----------|---------|
| 1     | 18.962    | 1199928 | 18.304     | 19.851   | 97.6265 |
| 2     | 20.337    | 29172   | 19.947     | 20.821   | 2.3735  |

Copy of  $^1\text{H}$  and  $^{13}\text{C}$  spectra for the (S,S)-2'

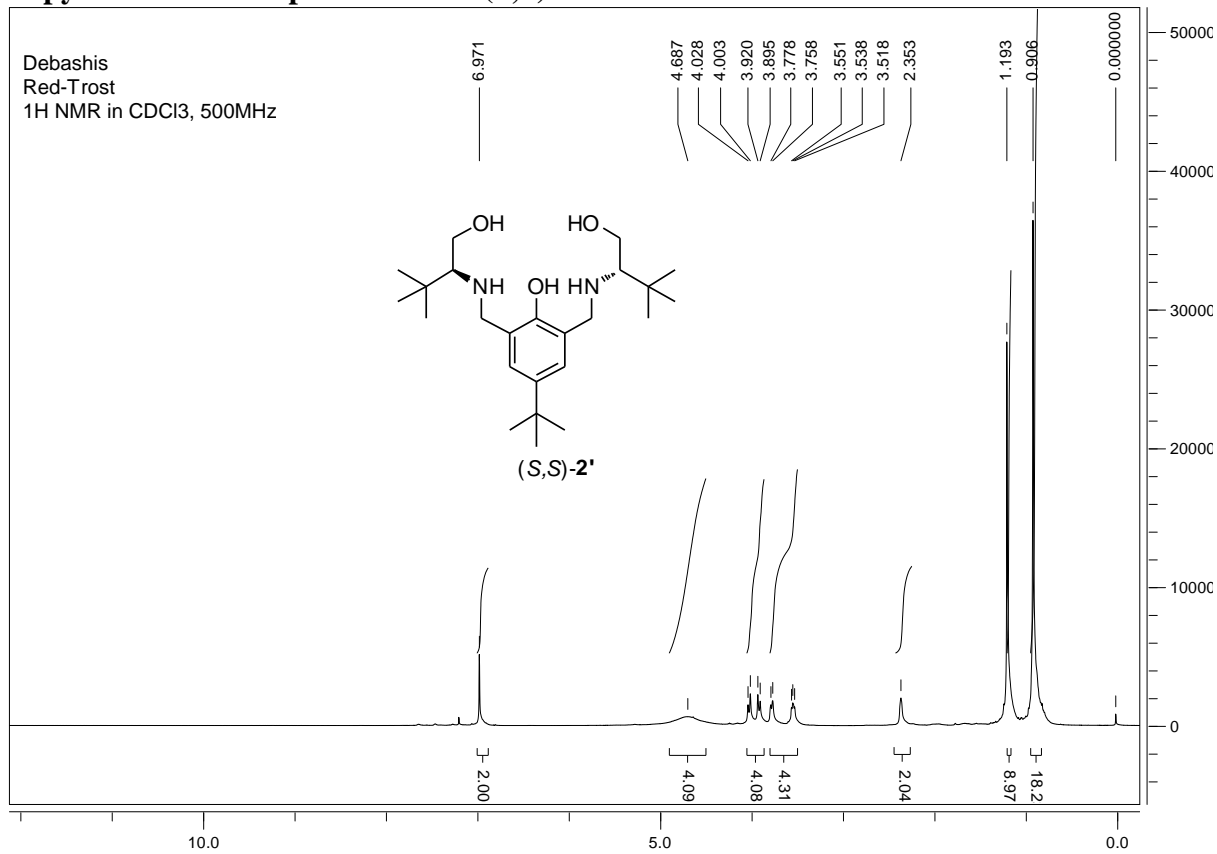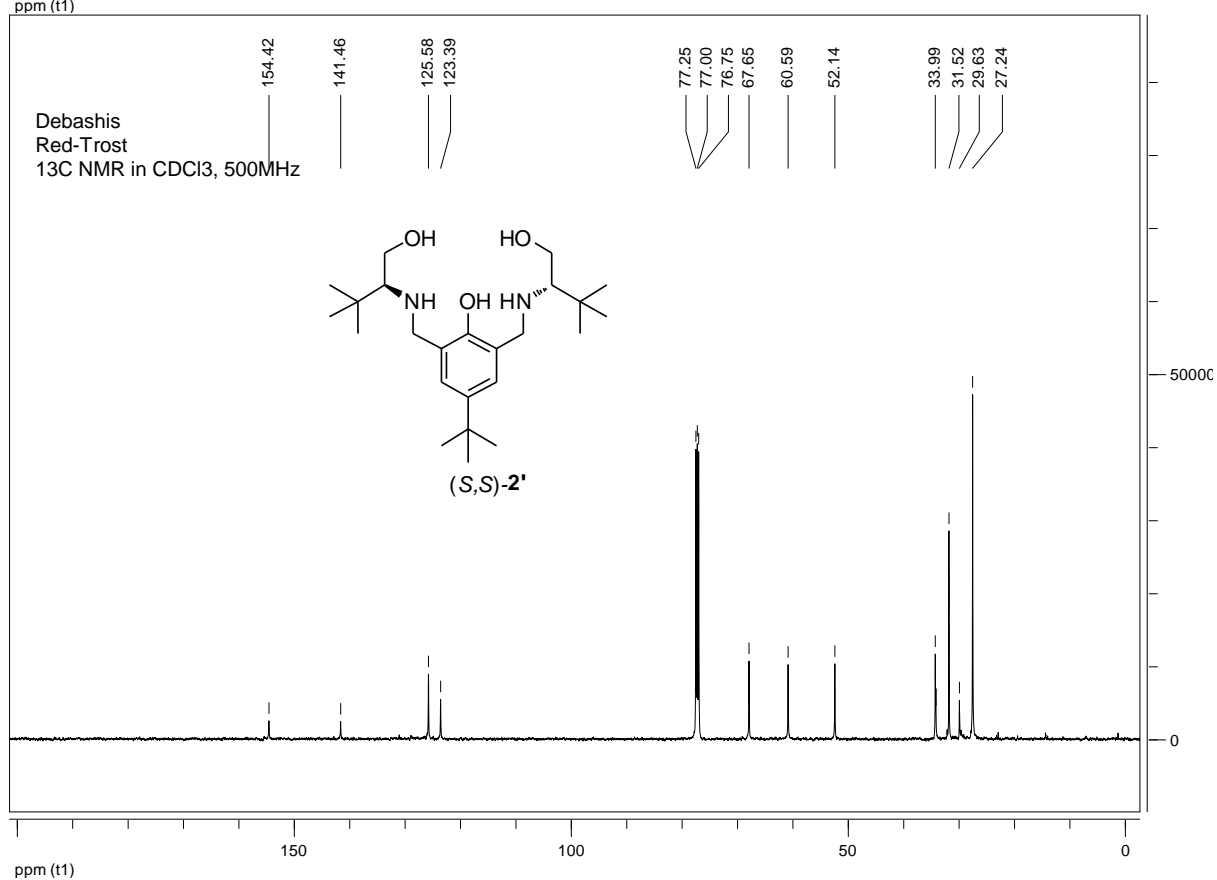

# Copy of $^1\text{H}$ and $^{13}\text{C}$ spectra for the products

## $^1\text{H}$ and $^{13}\text{C}$ NMR spectra of *N*-(1-Phenylbut-3-enyl)-4-methylbenzenesulfonamide 2a

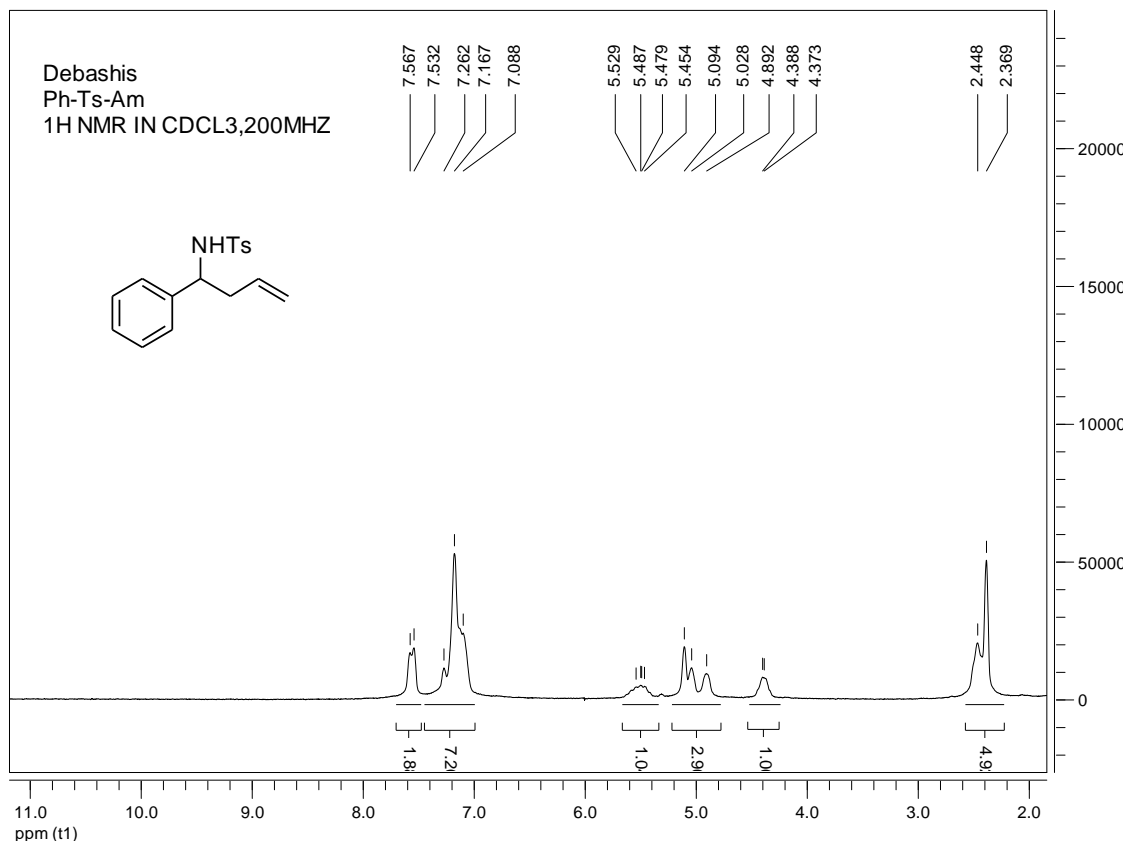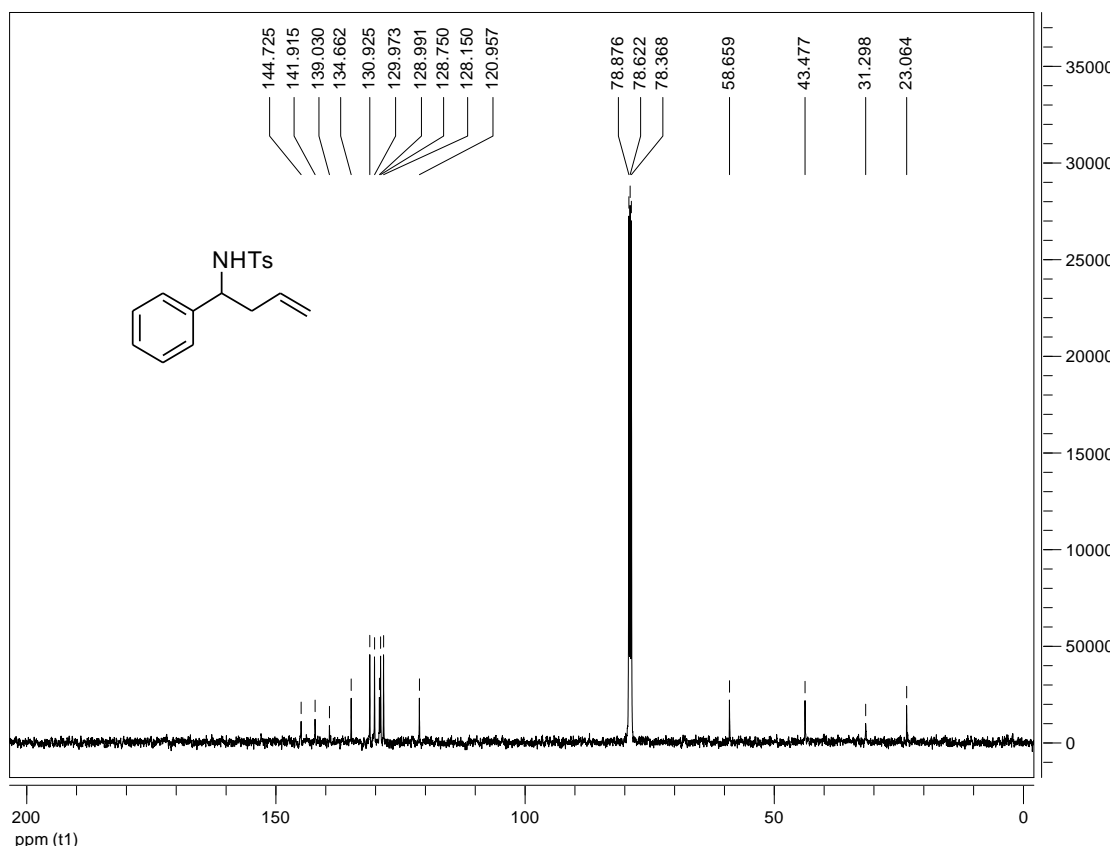

**$^1\text{H}$  and  $^{13}\text{C}$  NMR spectra of *N*-(1-(4-Chlorophenyl)but-3-enyl)-4-methylbenzenesulfonamide 2b**

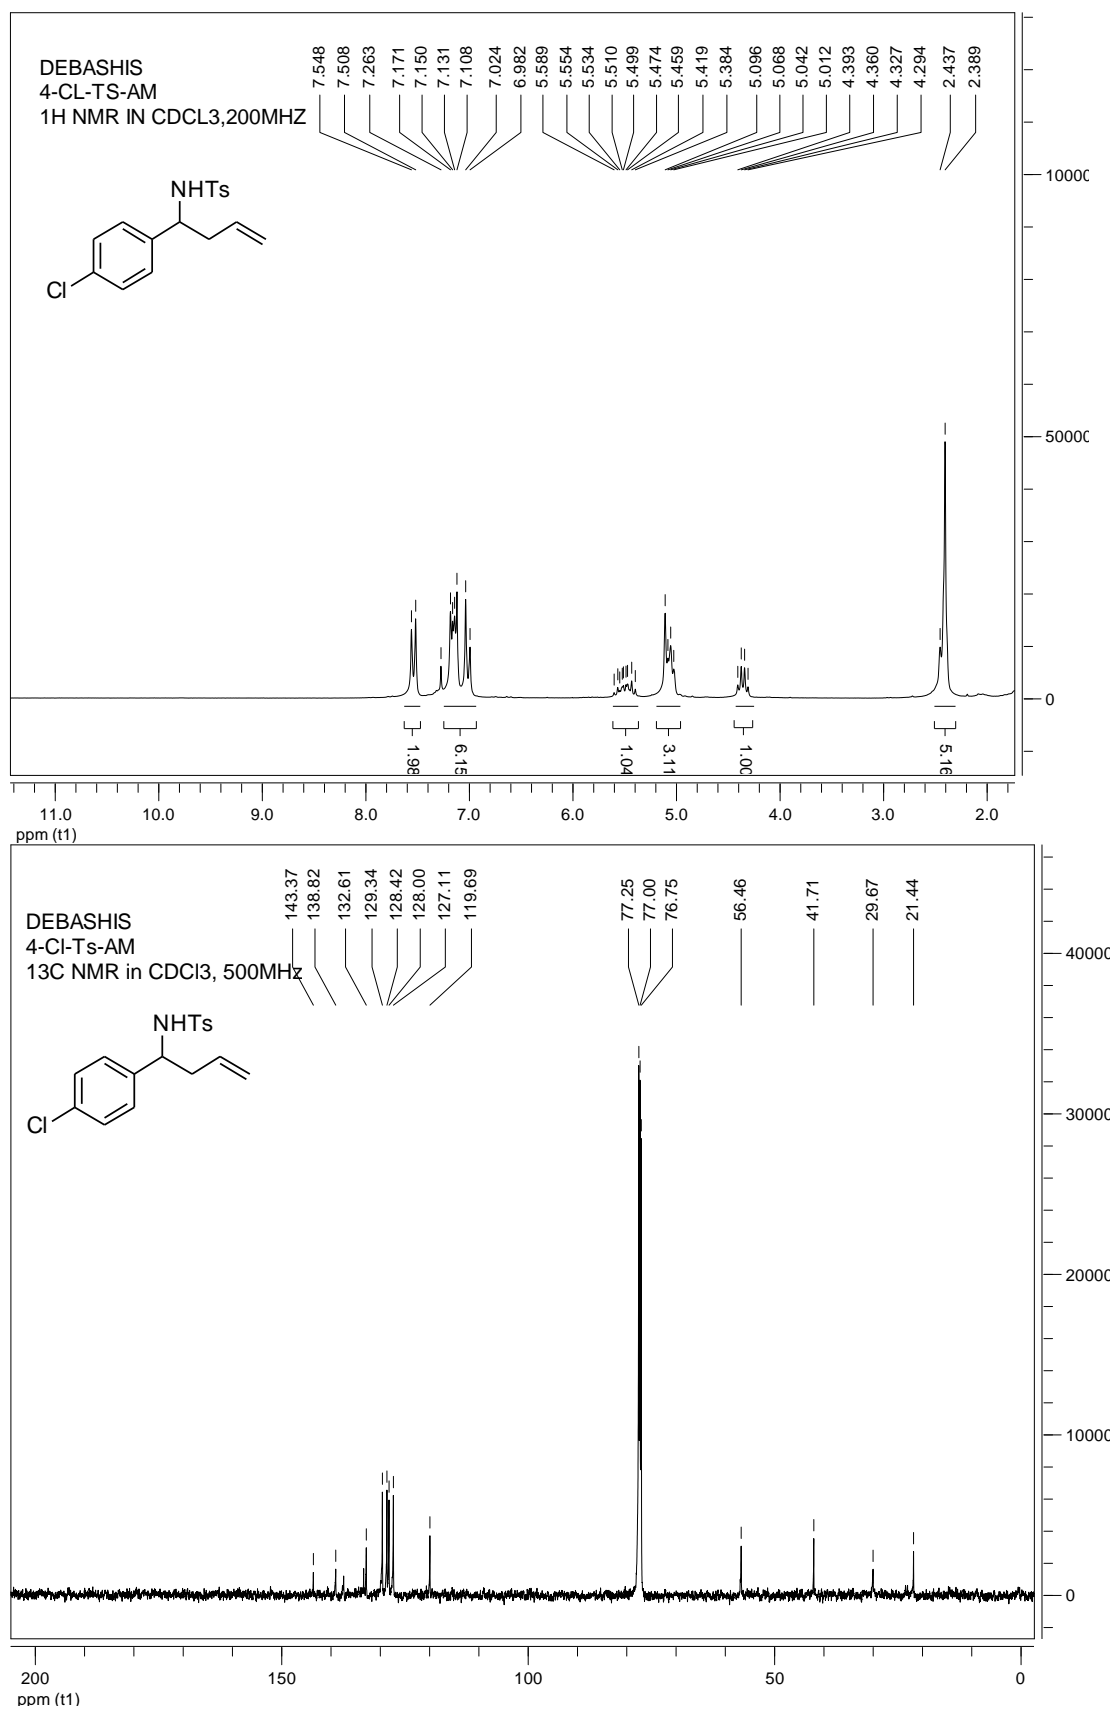

# <sup>1</sup>H and <sup>13</sup>C NMR spectra of *N*-(1-(4-Chlorophenyl)but-3-enyl)benzenesulfonamide **2c**

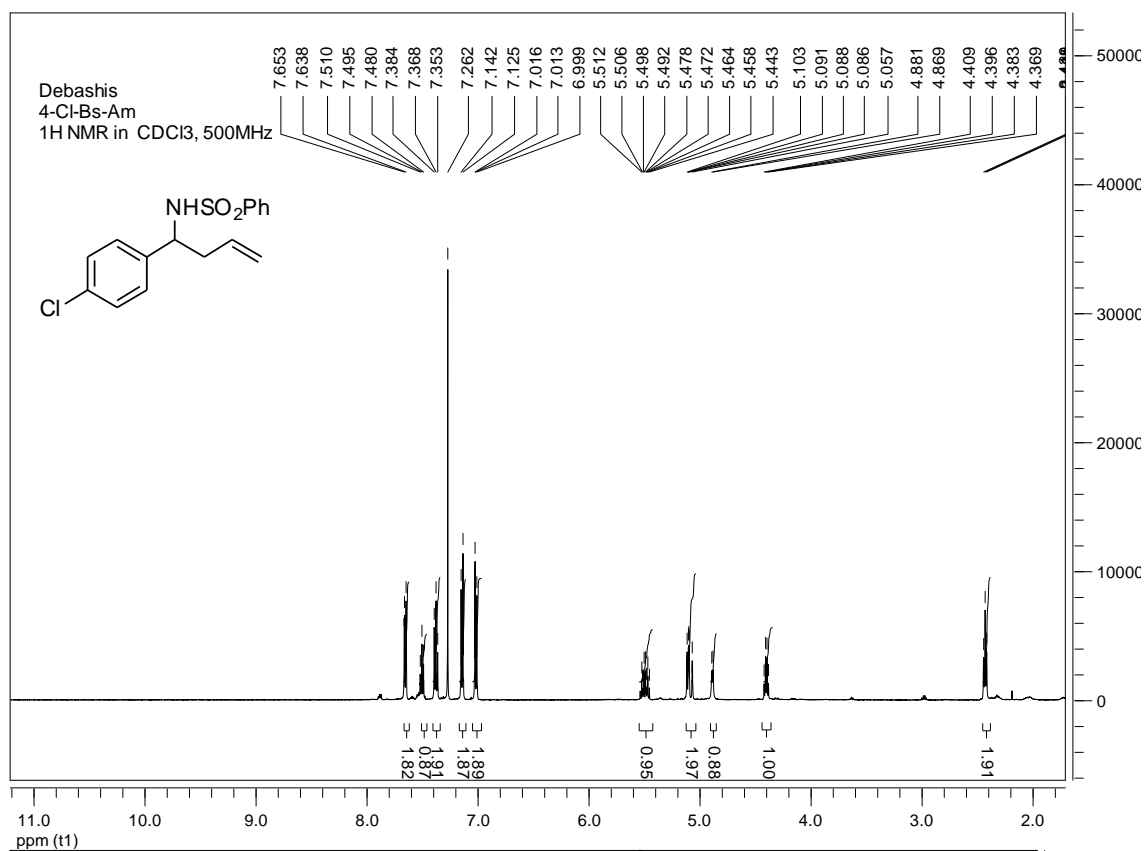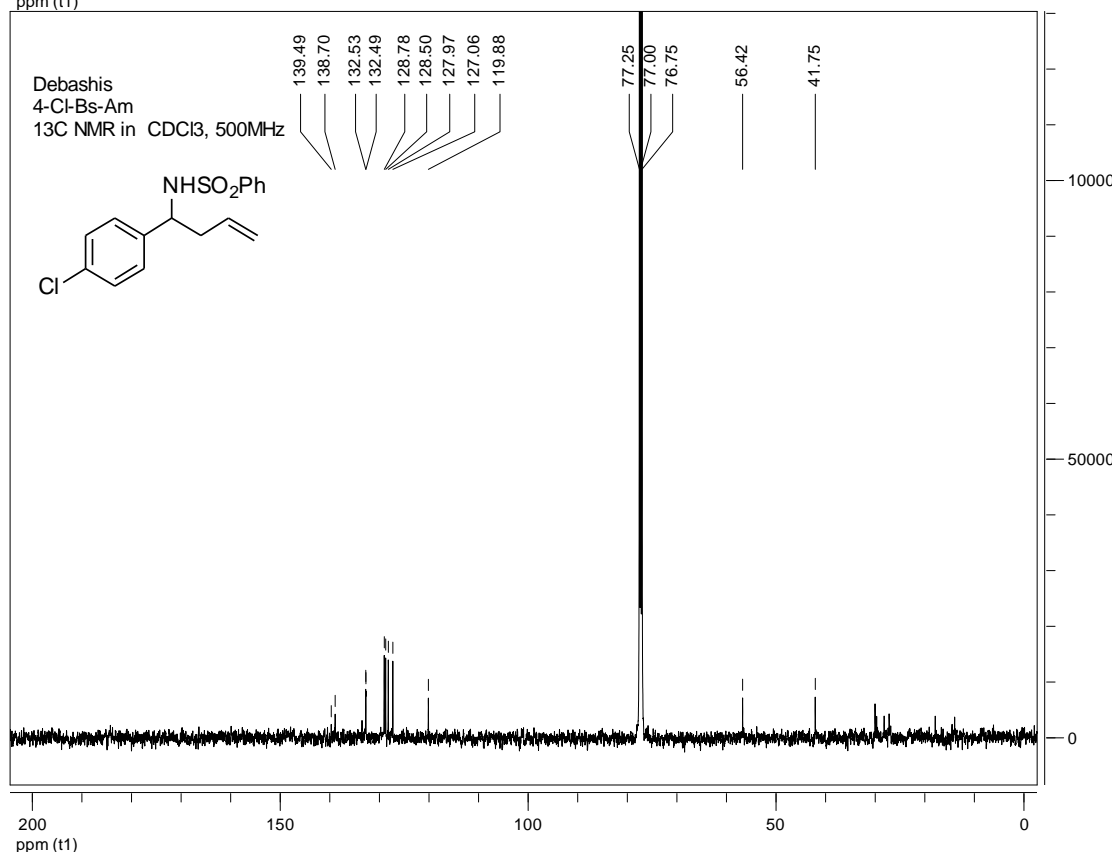

**<sup>1</sup>H and <sup>13</sup>C NMR spectra of *N*-(1-(4-Chlorophenyl)but-3-enyl)-4-nitrobenzenesulfonamide 2d**

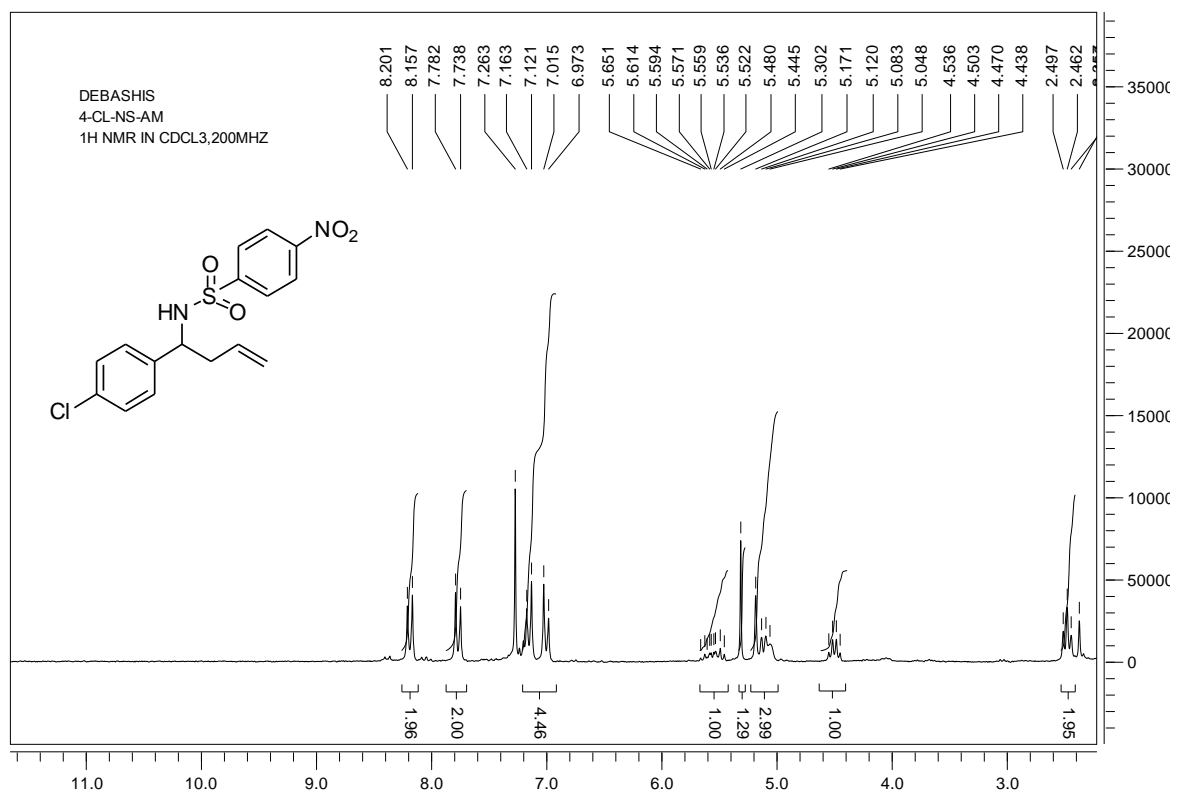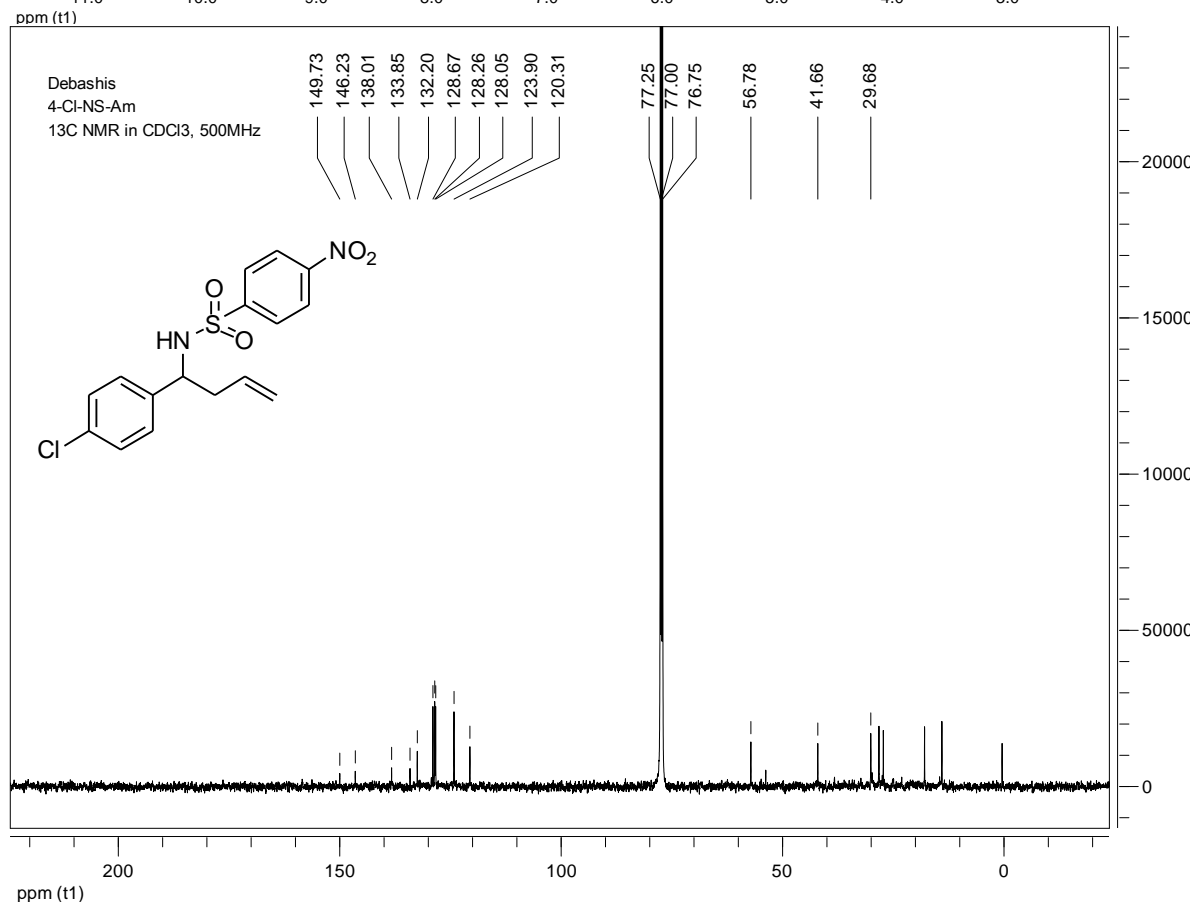

# $^1\text{H}$ and $^{13}\text{C}$ NMR spectra of *N*-(1-(4-Bromophenyl)but-3-enyl)benzenesulfonamide **2e**

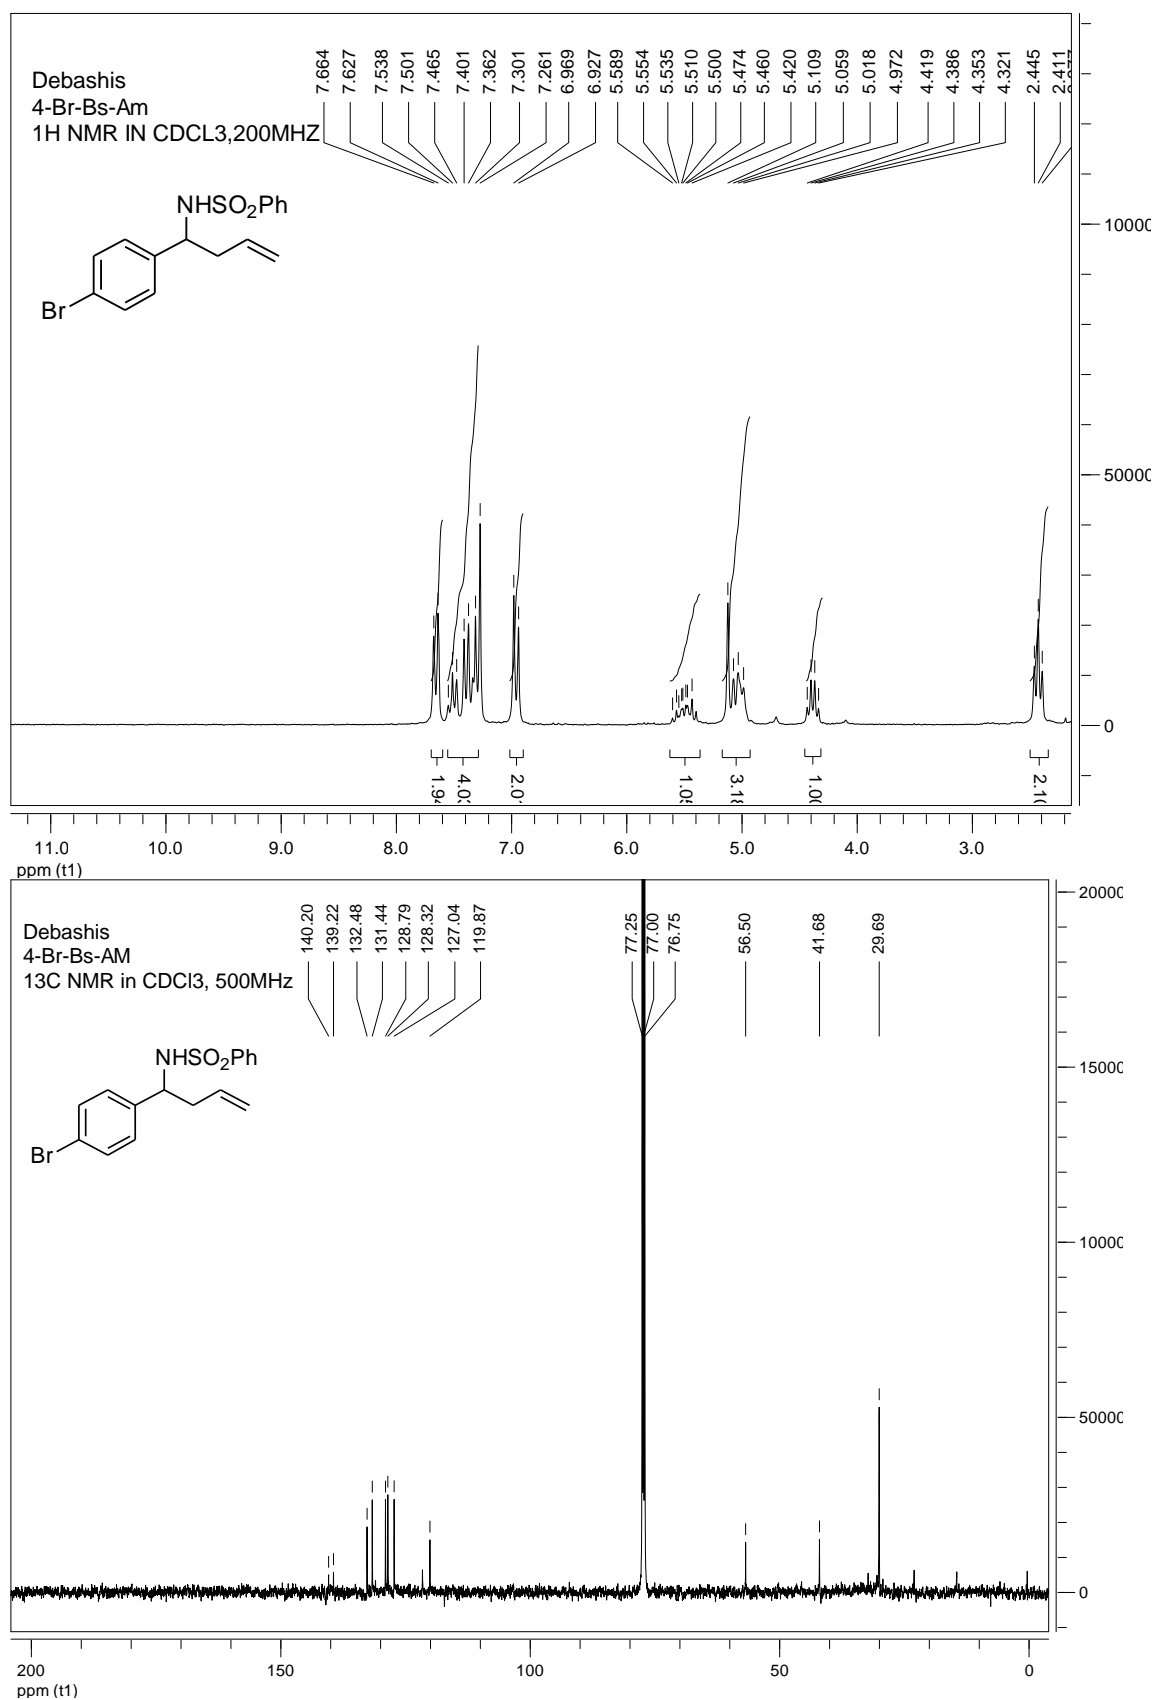



**<sup>1</sup>H and <sup>13</sup>C NMR spectra of *N*-(1-(4-Fluorophenyl)but-3-enyl)-4-methylbenzenesulfonamide 2f**

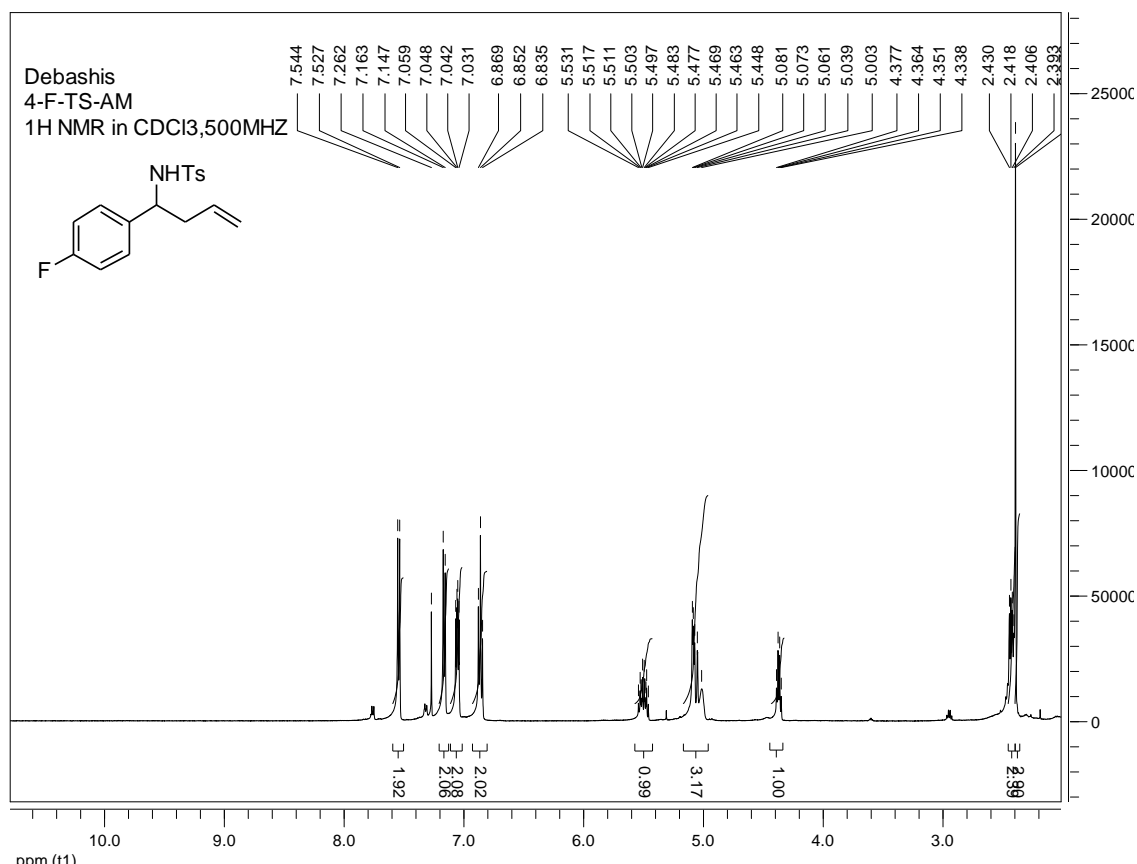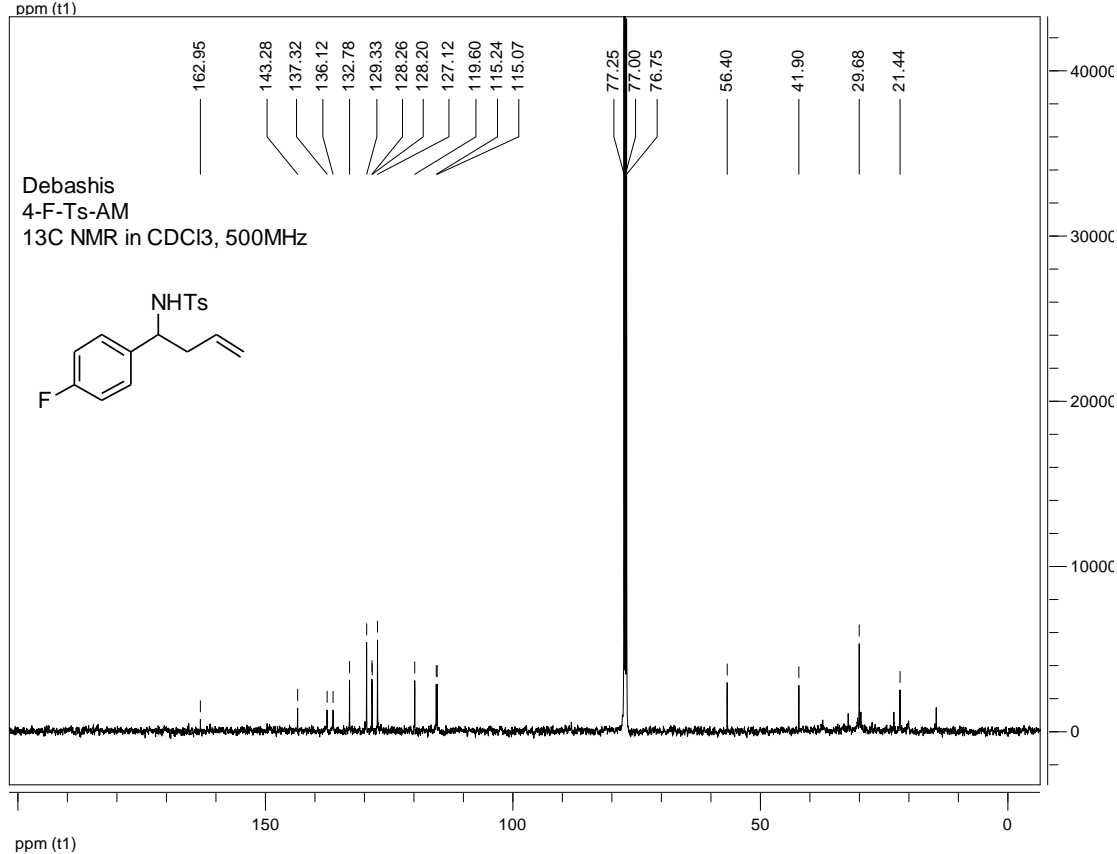

**<sup>1</sup>H and <sup>13</sup>C NMR spectra of *N*-(1-(4-Nitrophenyl)but-3-enyl)-4-methylbenzenesulfonamide **2g****

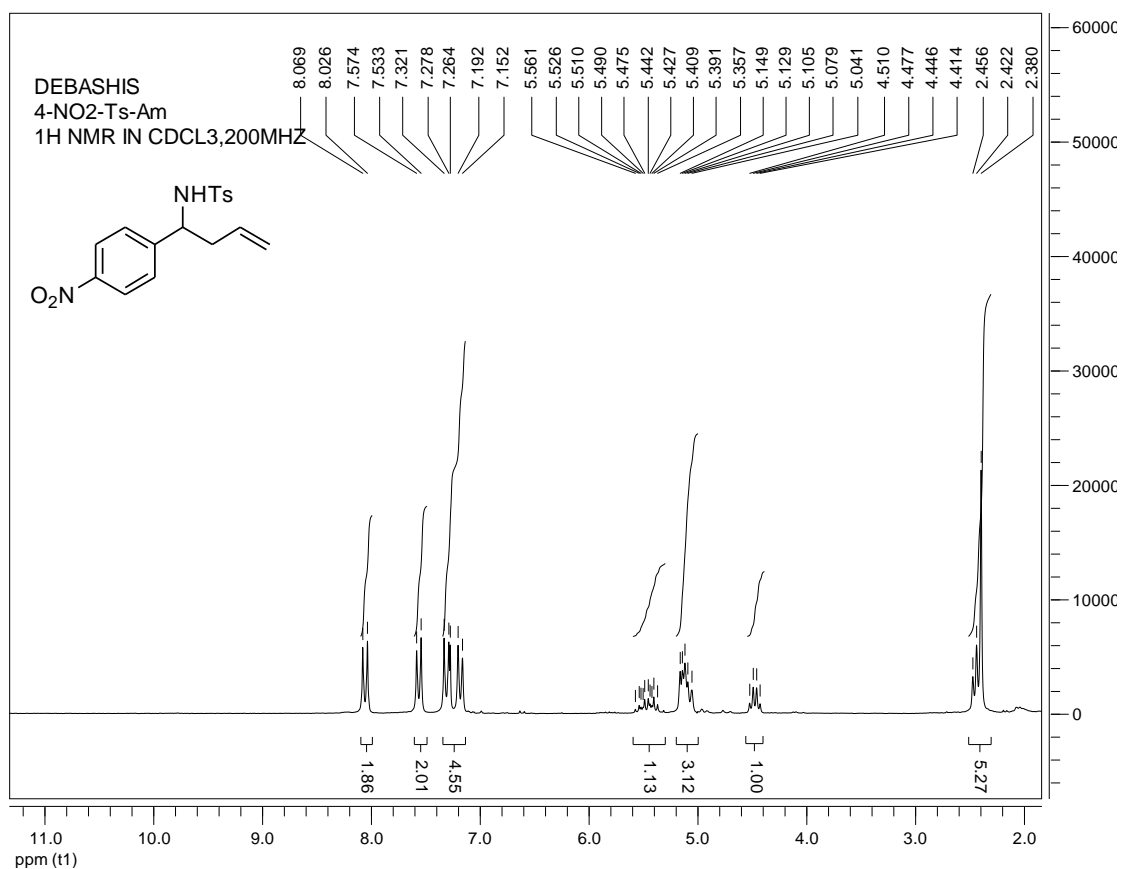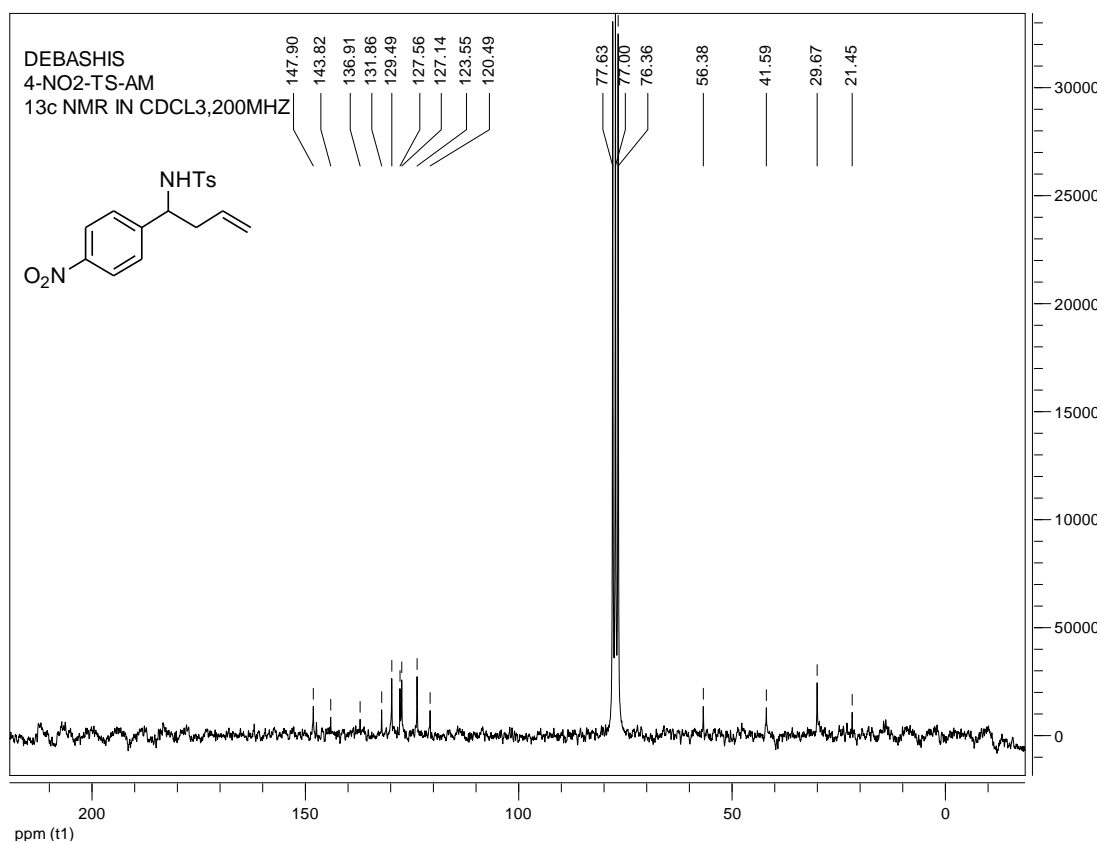

**<sup>1</sup>H and <sup>13</sup>C NMR spectra of *N*-(1-(4-Trifluoromethylphenyl)but-3-enyl)-4-methylbenzenesulfonamide 2h**

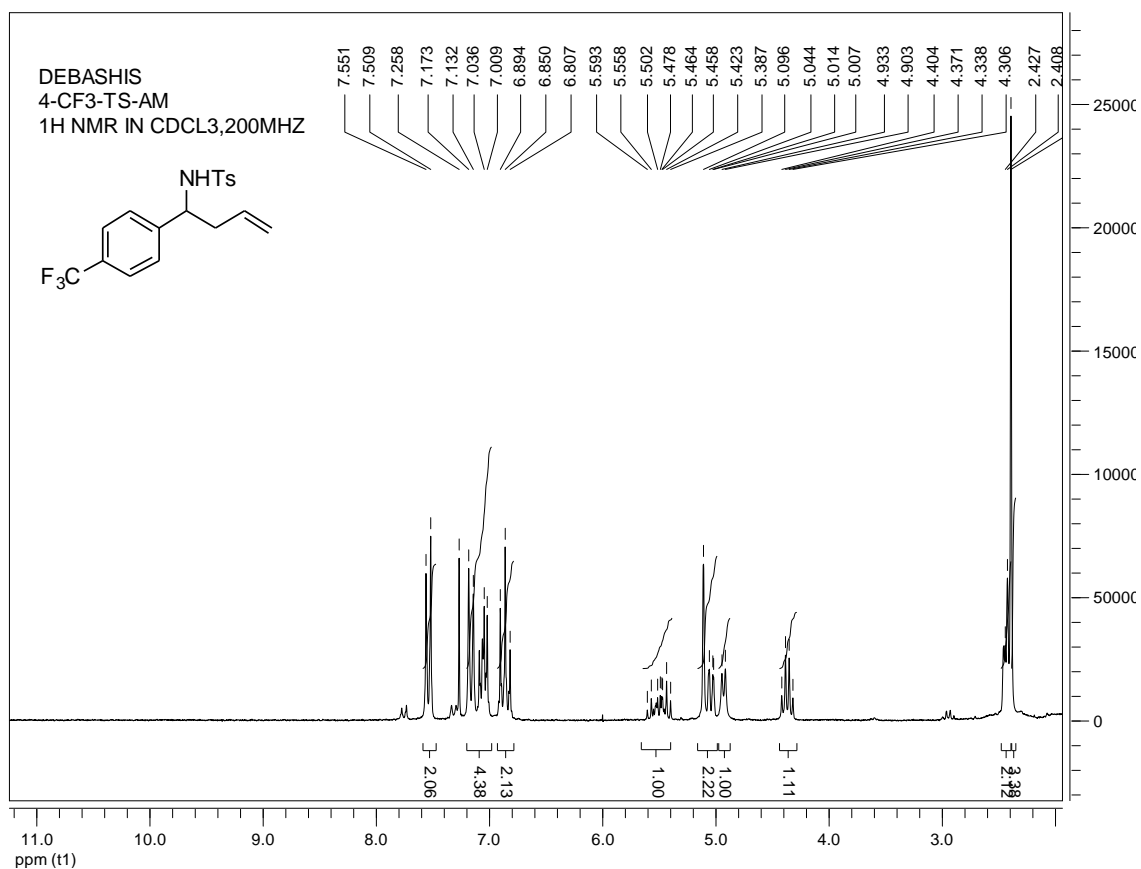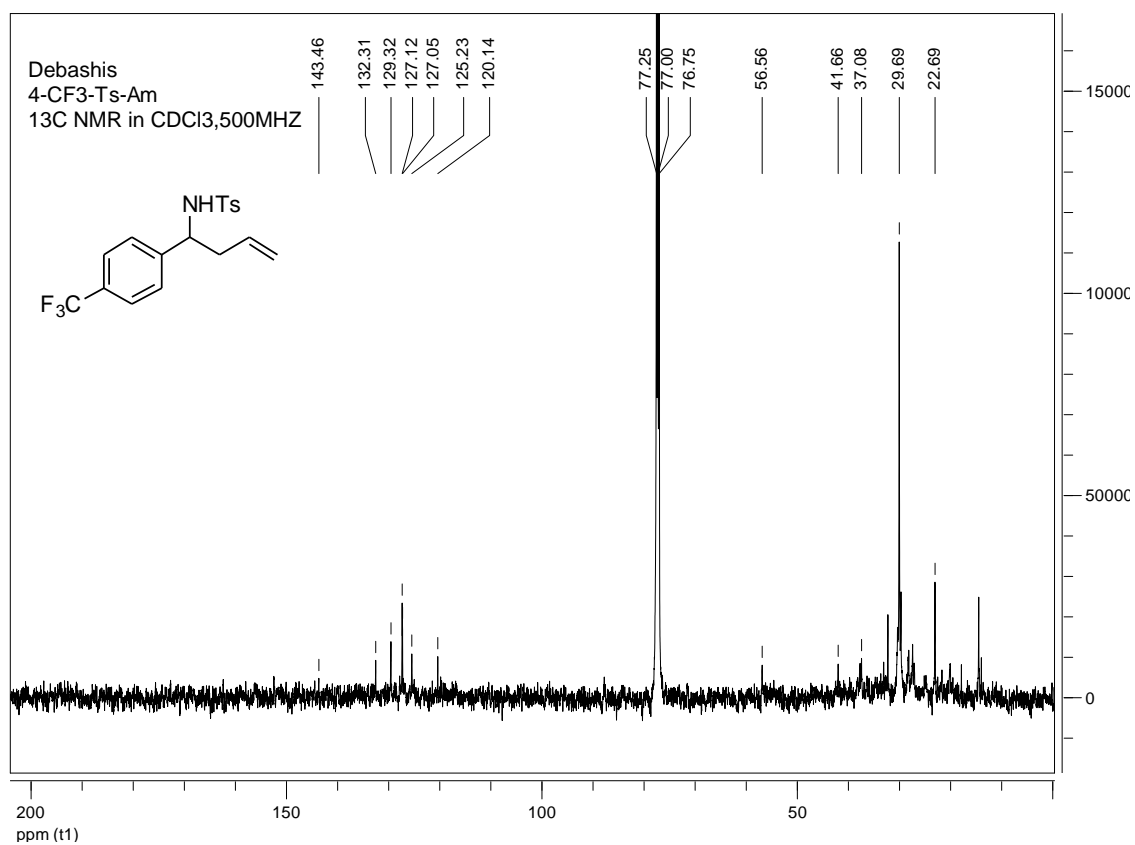

### *N*-(1-(4-Methoxyphenyl)but-3-enyl)benzenesulfonamide **2i**

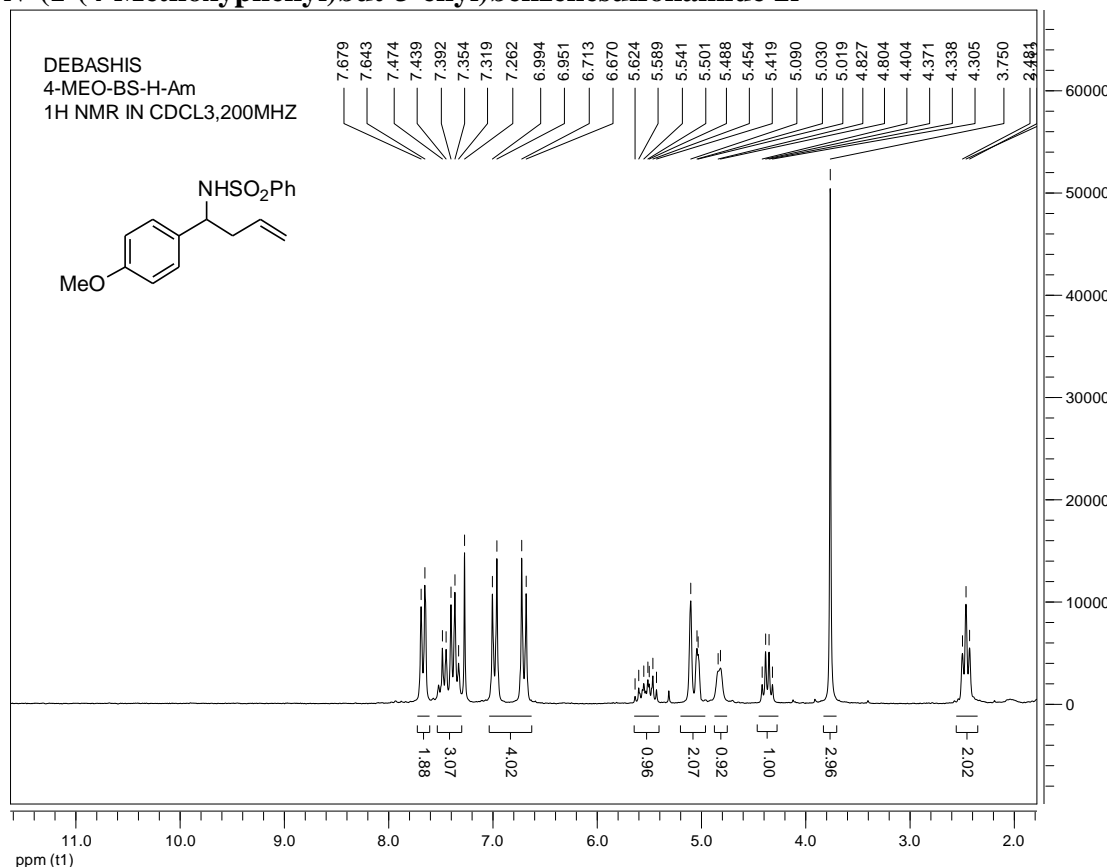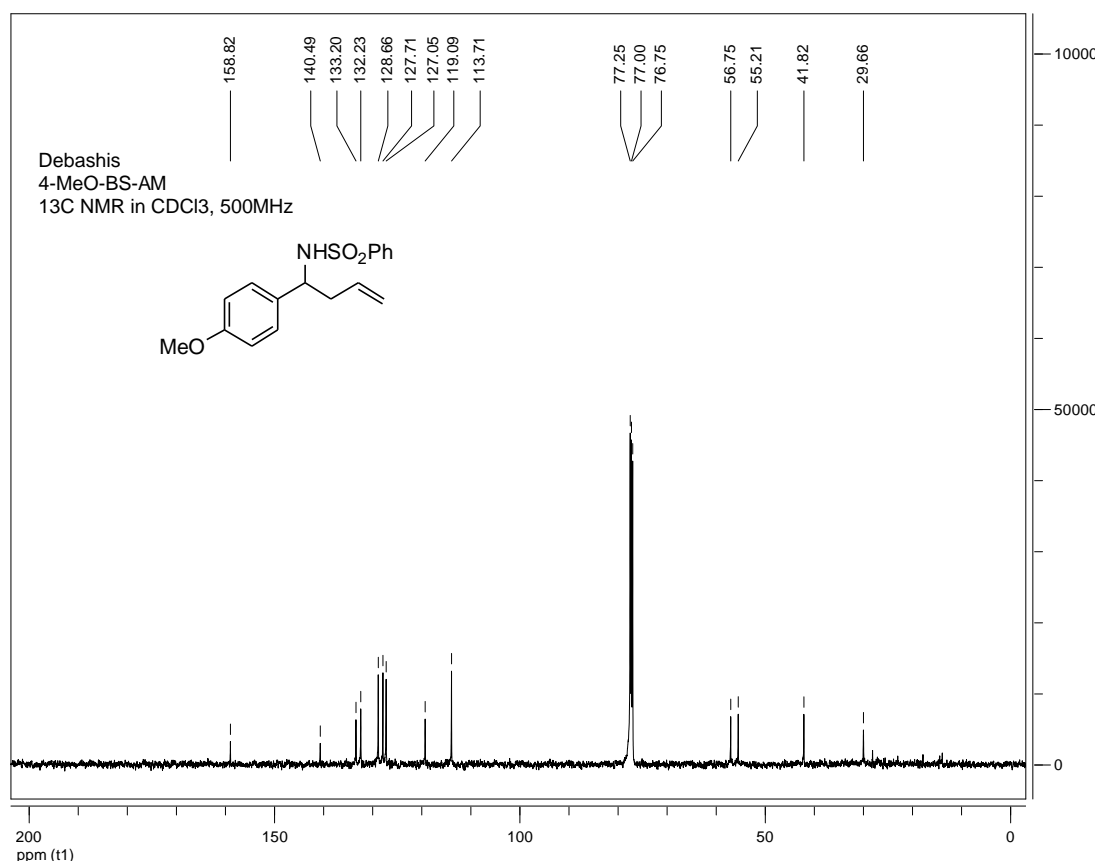

**$^1\text{H}$  and  $^{13}\text{C}$  NMR spectra of *N*-(1-(3-Chlorophenyl)but-3-enyl)-4-methylbenzenesulfonamide **2j****

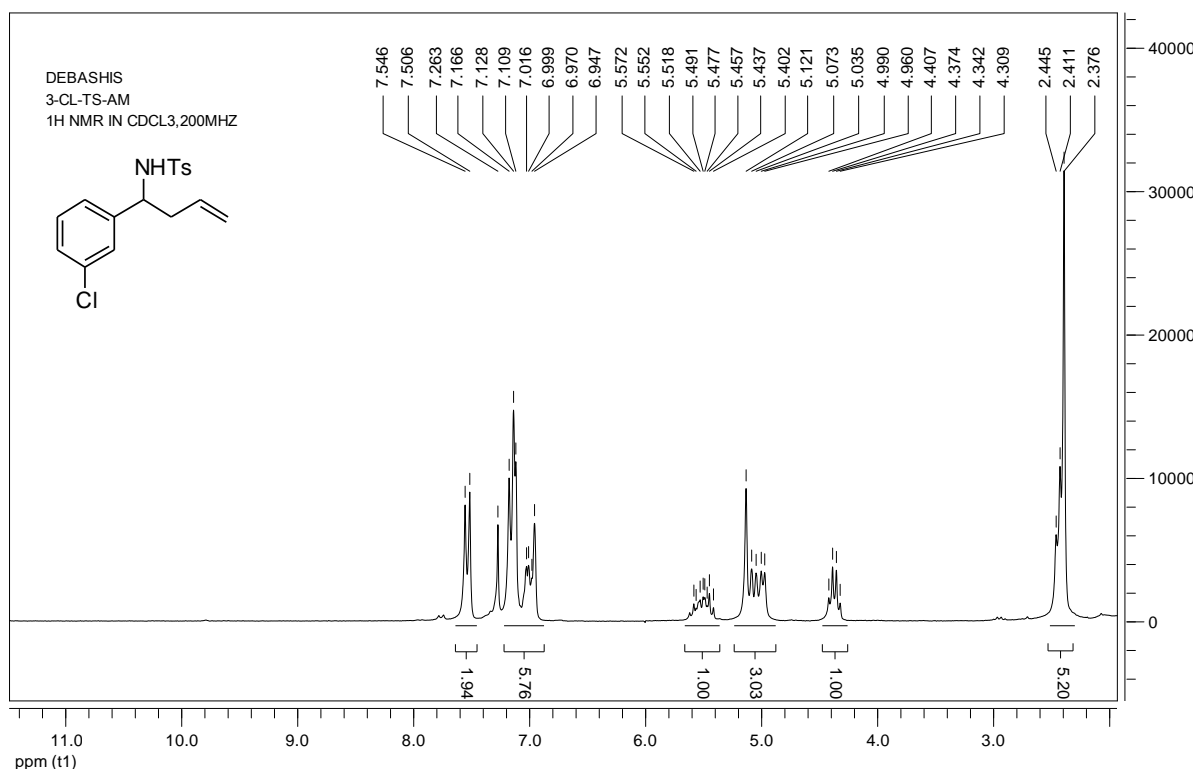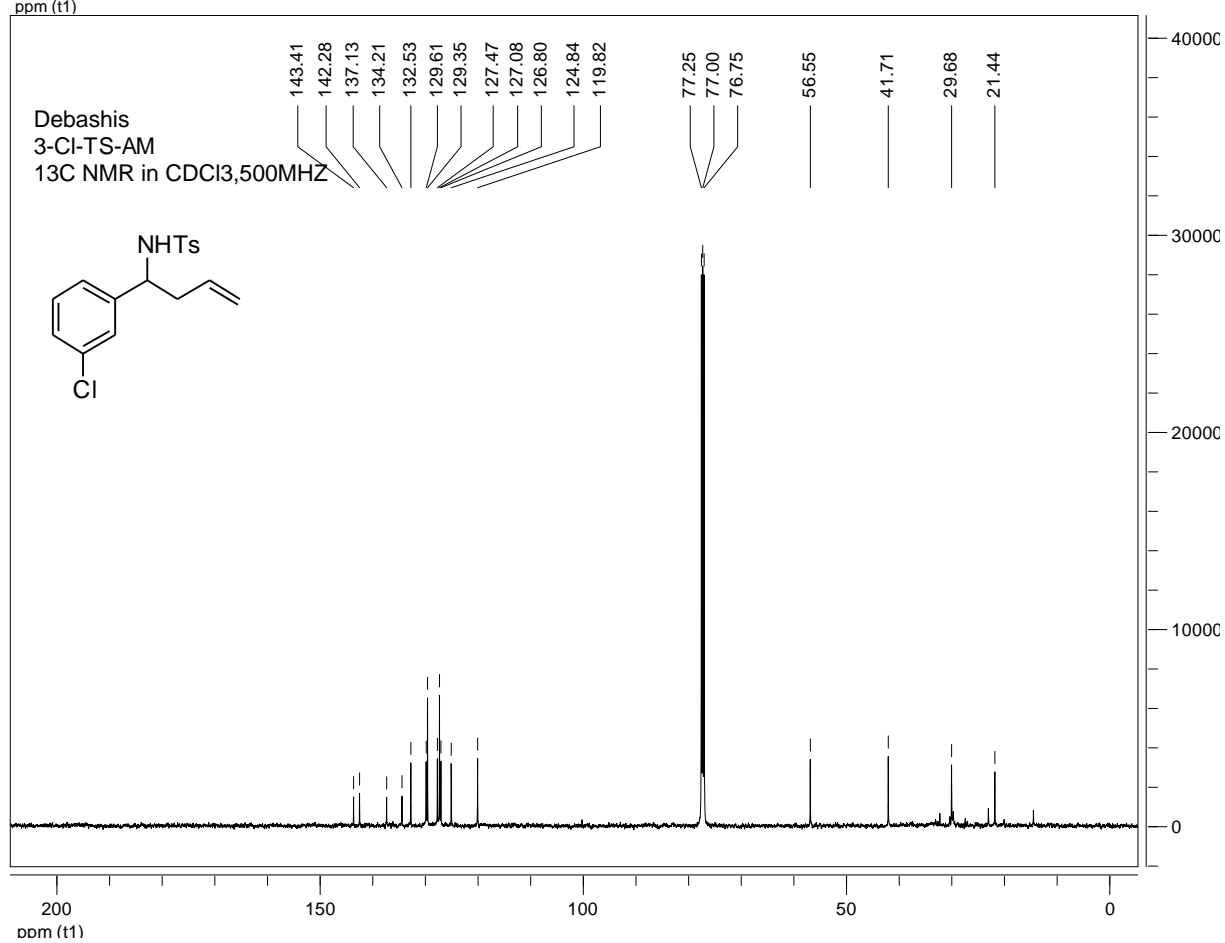

**$^1\text{H}$  and  $^{13}\text{C}$  NMR spectra of *N*-(1-(2-Chlorophenyl)but-3-enyl)-4-methylbenzenesulfonamide 2k**

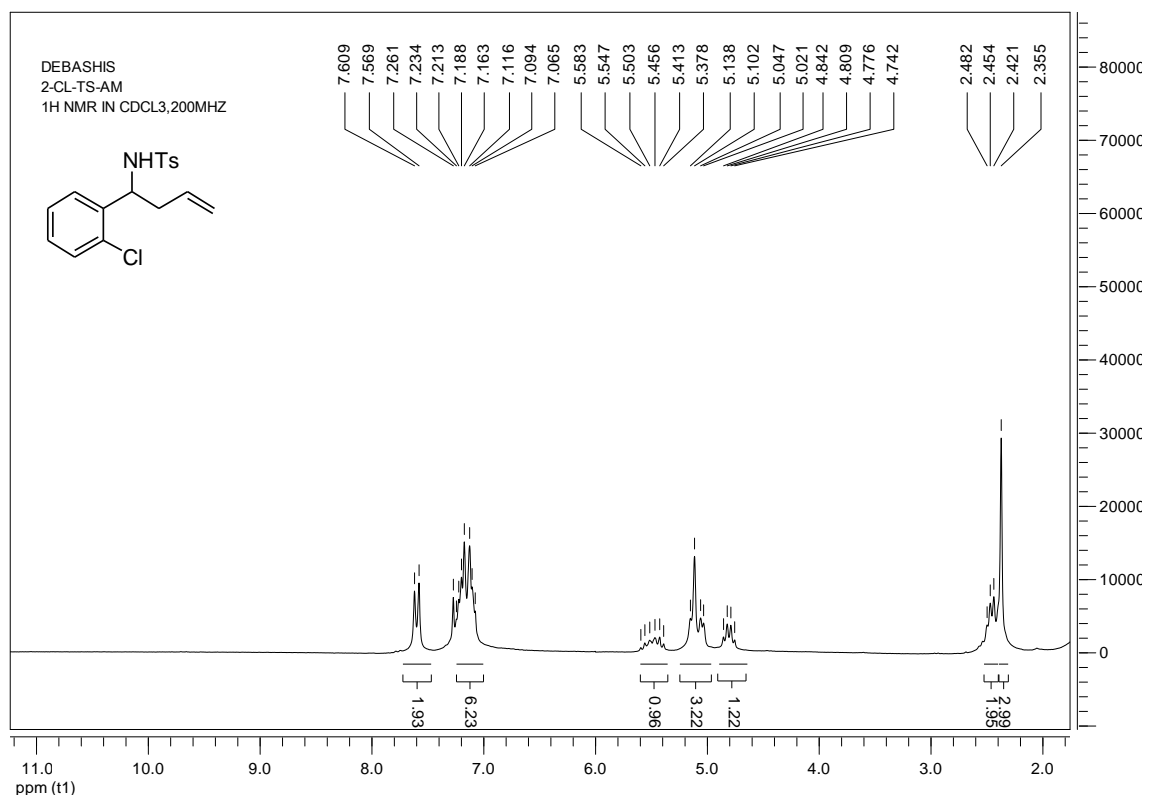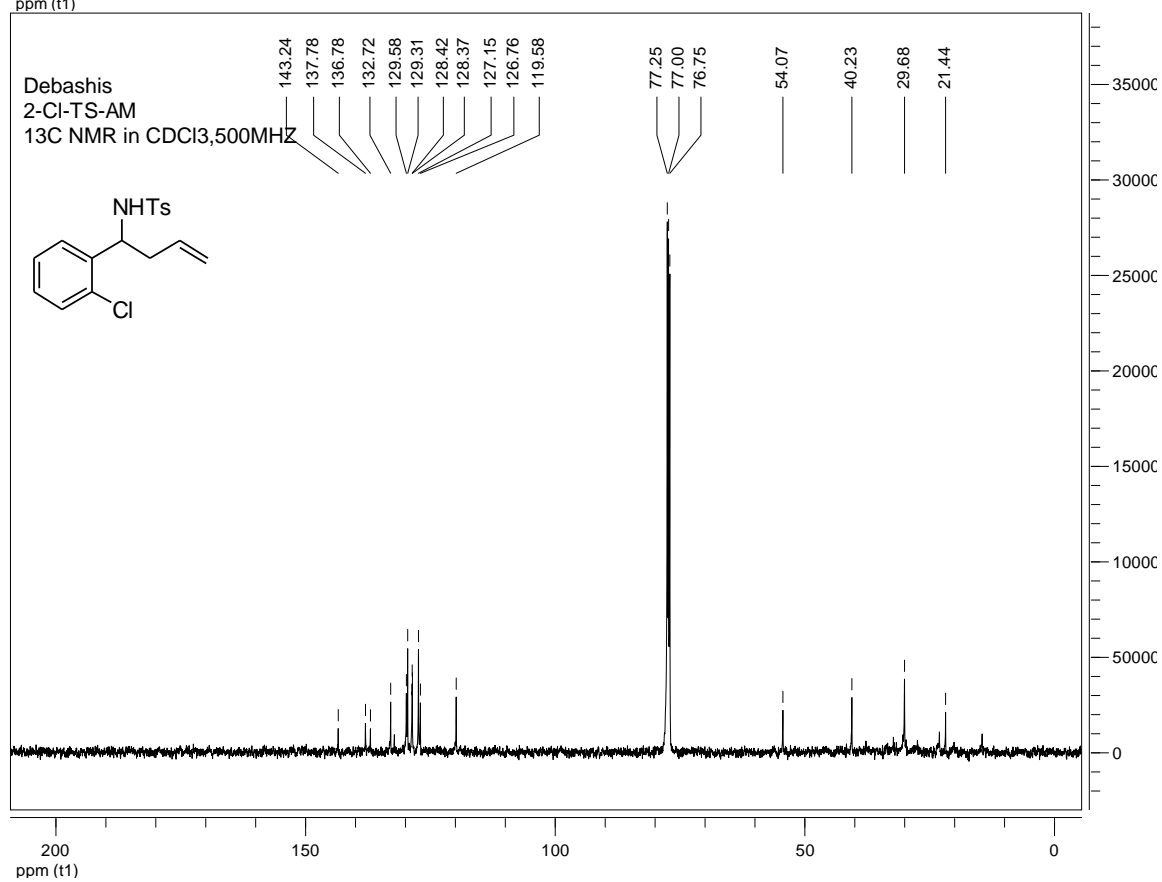

**<sup>1</sup>H and <sup>13</sup>C NMR spectra of *N*-(1-(2-Fluorophenyl)but-3-enyl)-4-methylbenzenesulfonamide 2l**

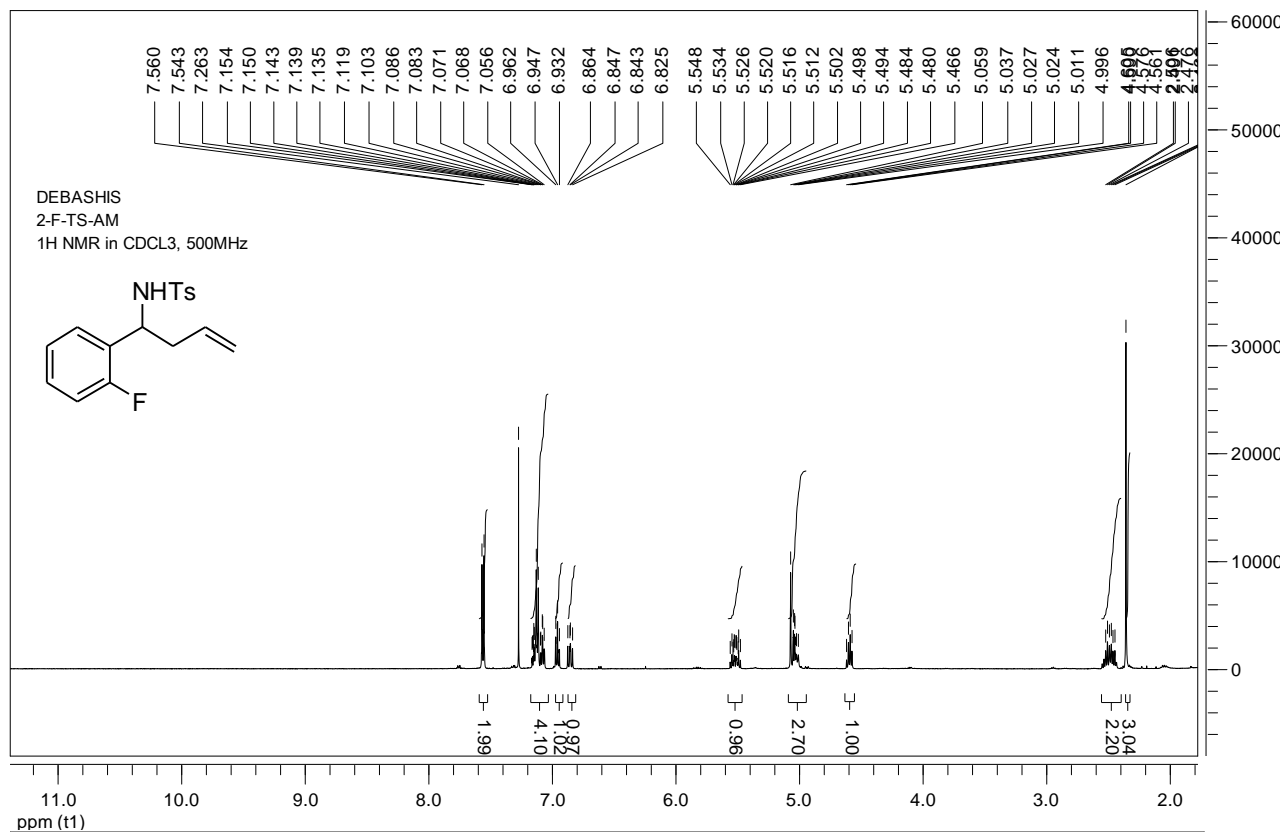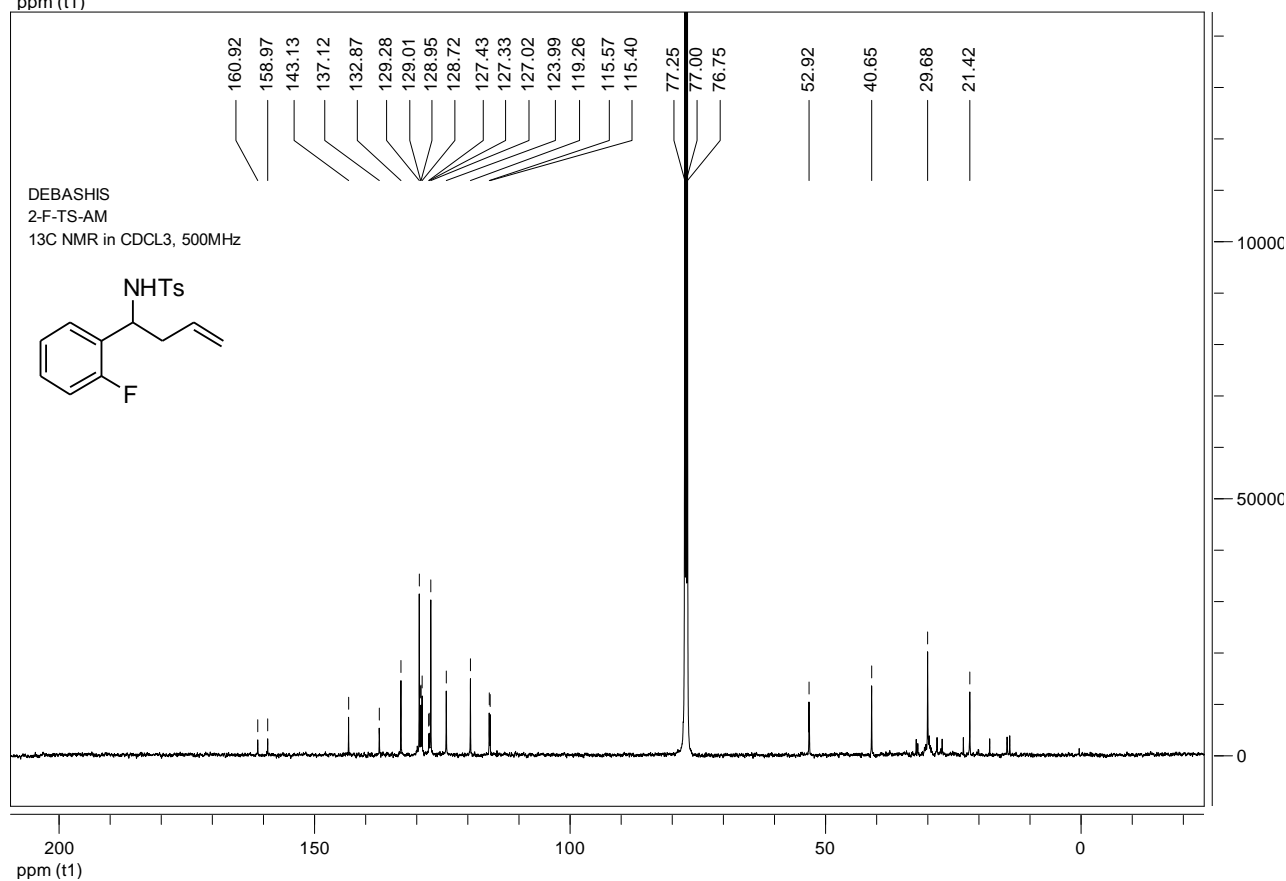

# $^1\text{H}$ and $^{13}\text{C}$ NMR spectra of *N*-(1-(1-Naphthyl)but-3-enyl)-4-methylbenzenesulfonamide

2m

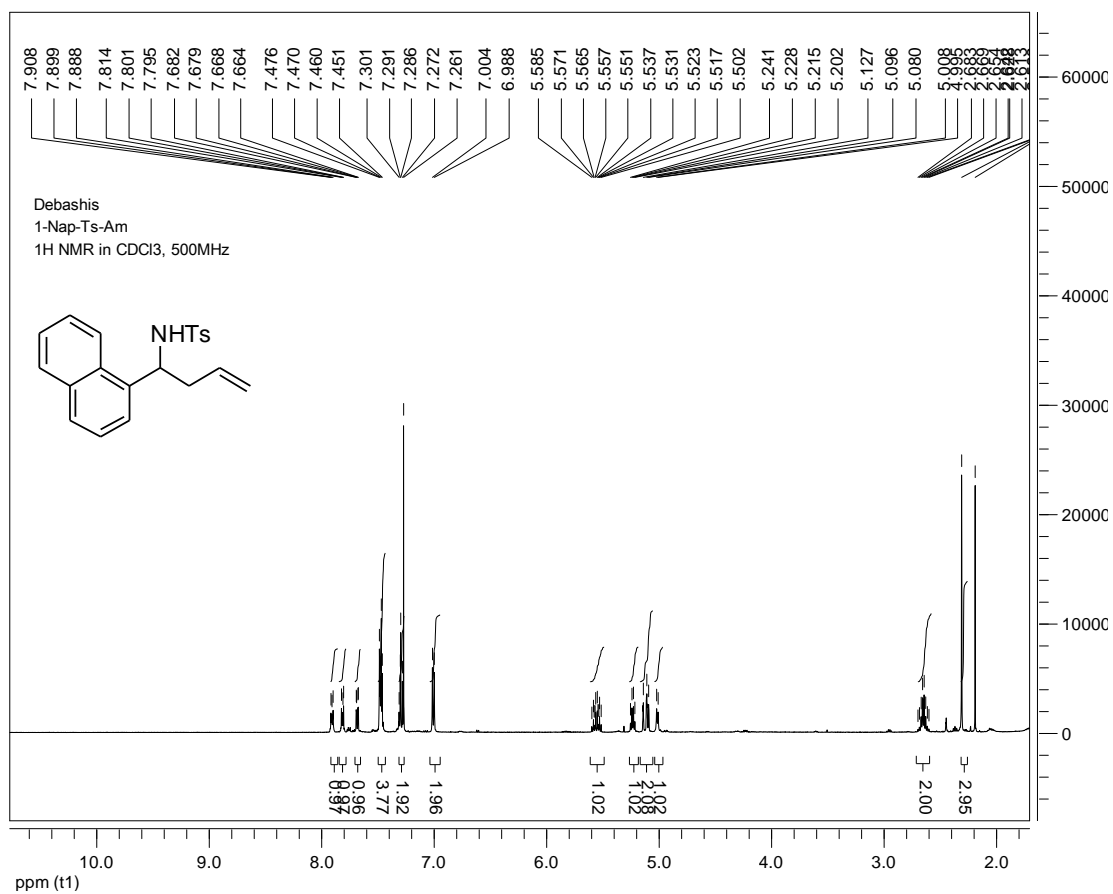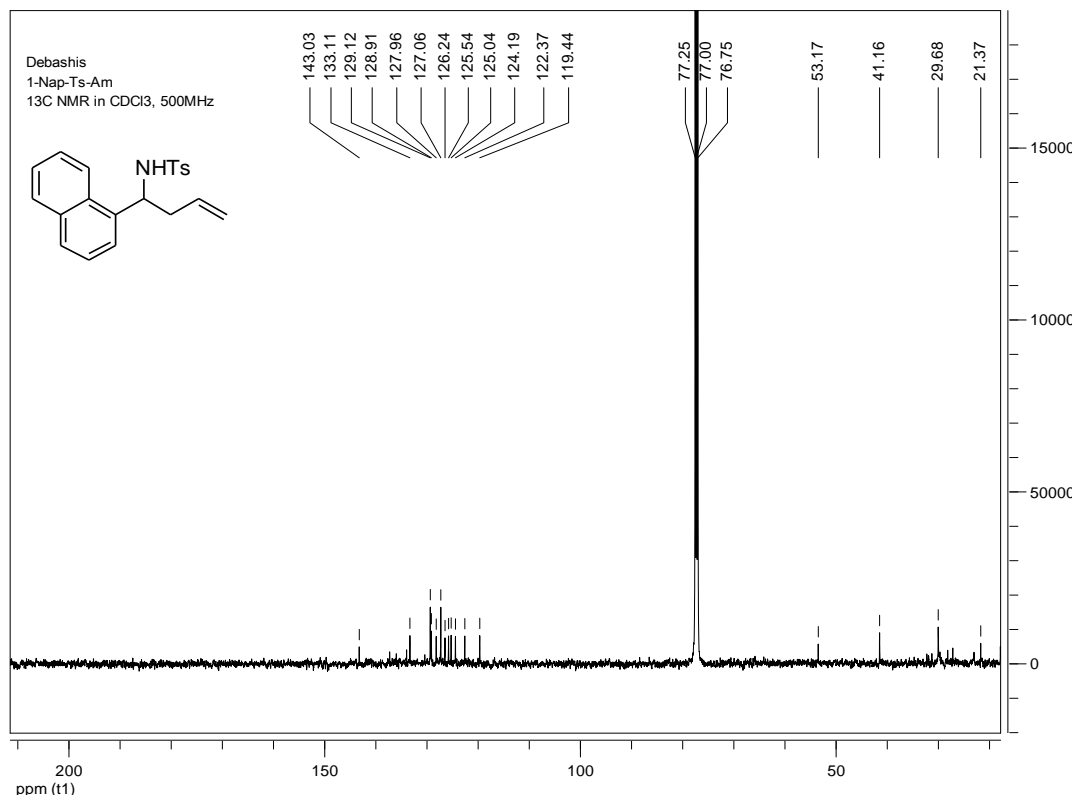



# $^1\text{H}$ and $^{13}\text{C}$ NMR spectra of *N*-(1-(2-Naphthyl)but-3-enyl)-4-methylbenzenesulfonamide

**2n**

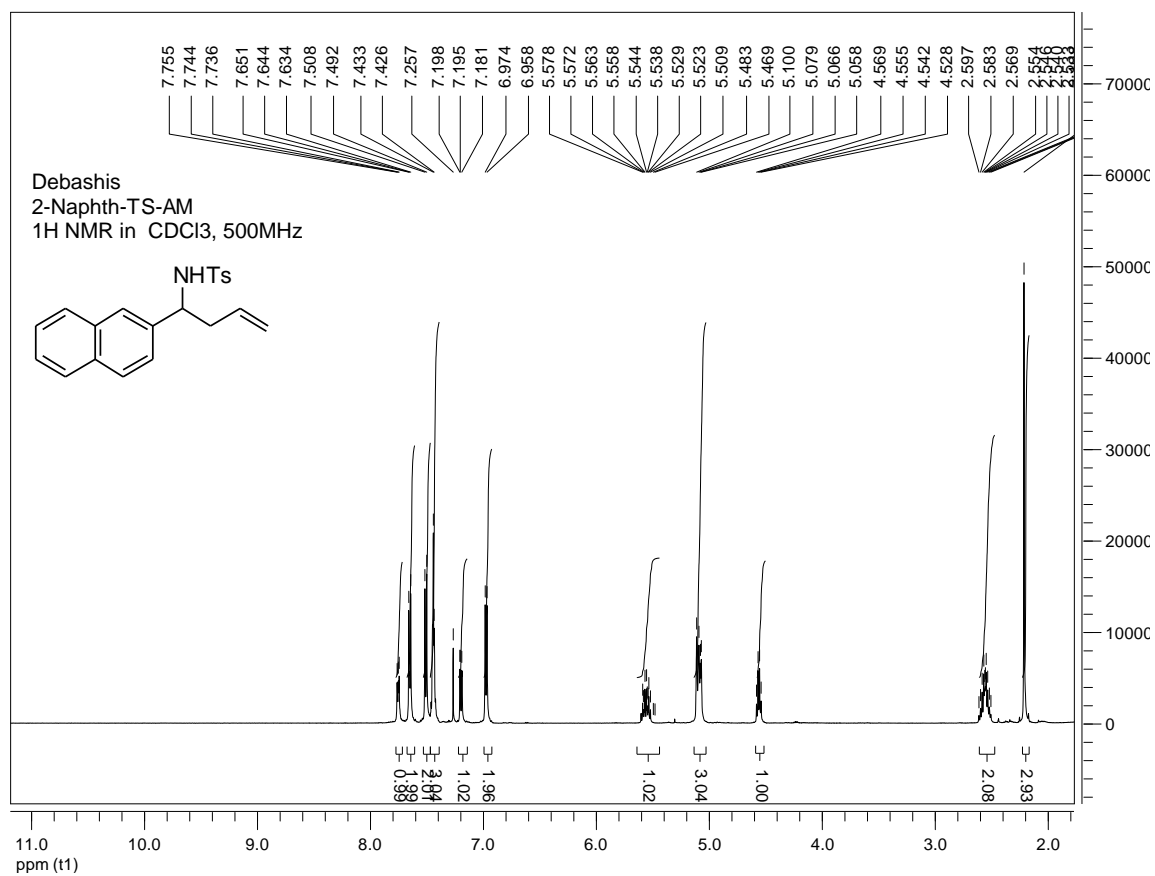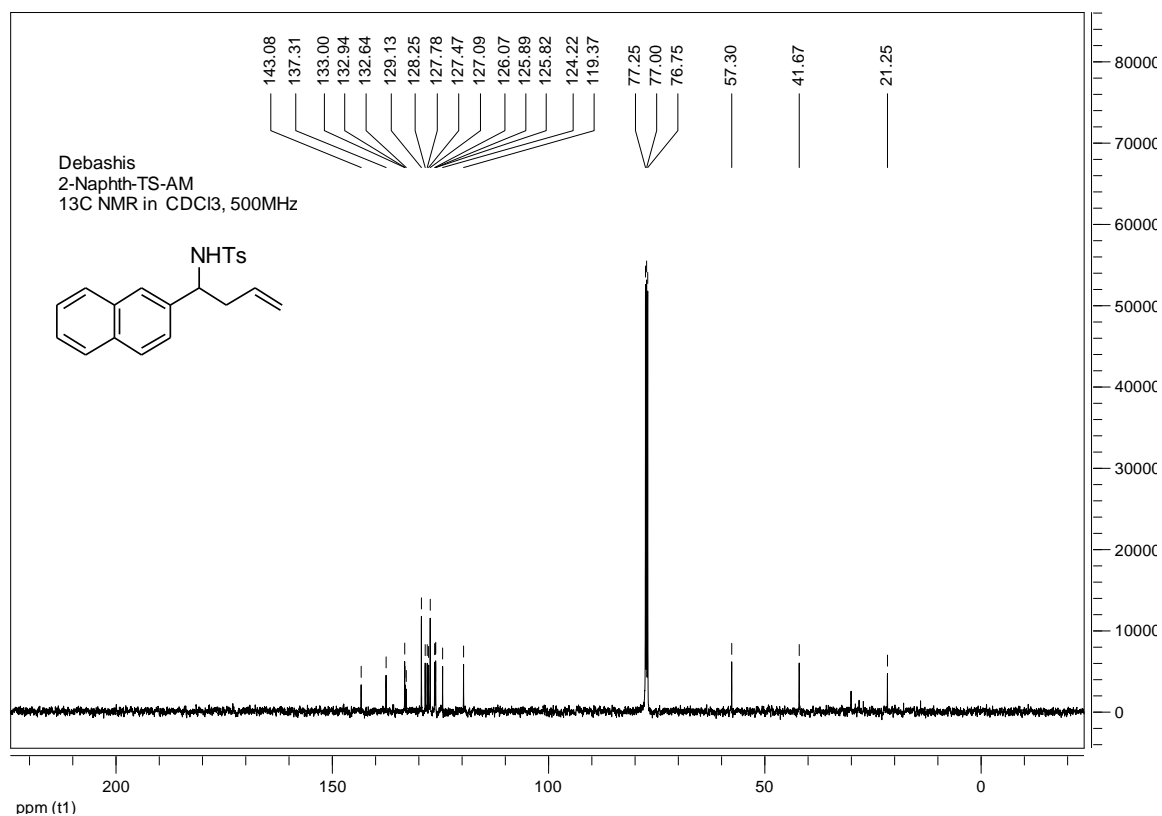

**<sup>1</sup>H and <sup>13</sup>C NMR spectra of (*E*)-*N*-(1-Phenylhexa-1,5-diene-3-yl)-4-methylbenzenesulfonamide 2o**

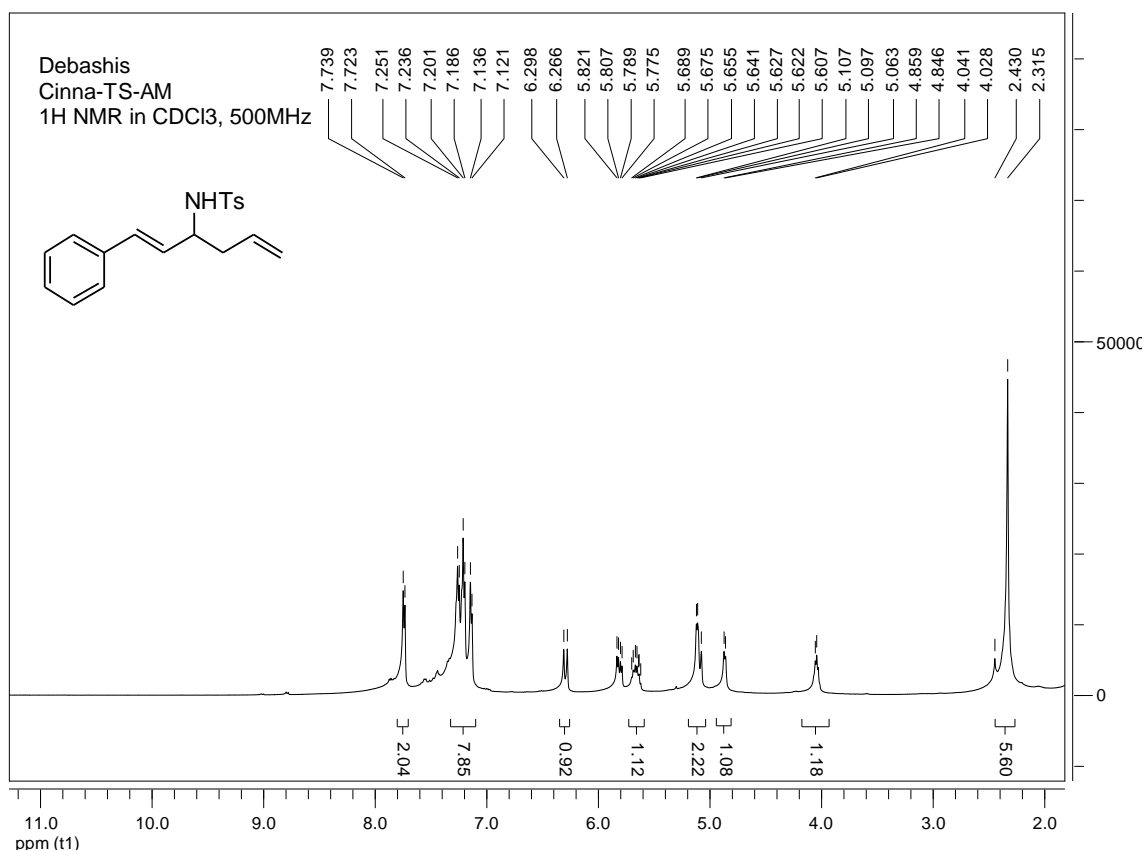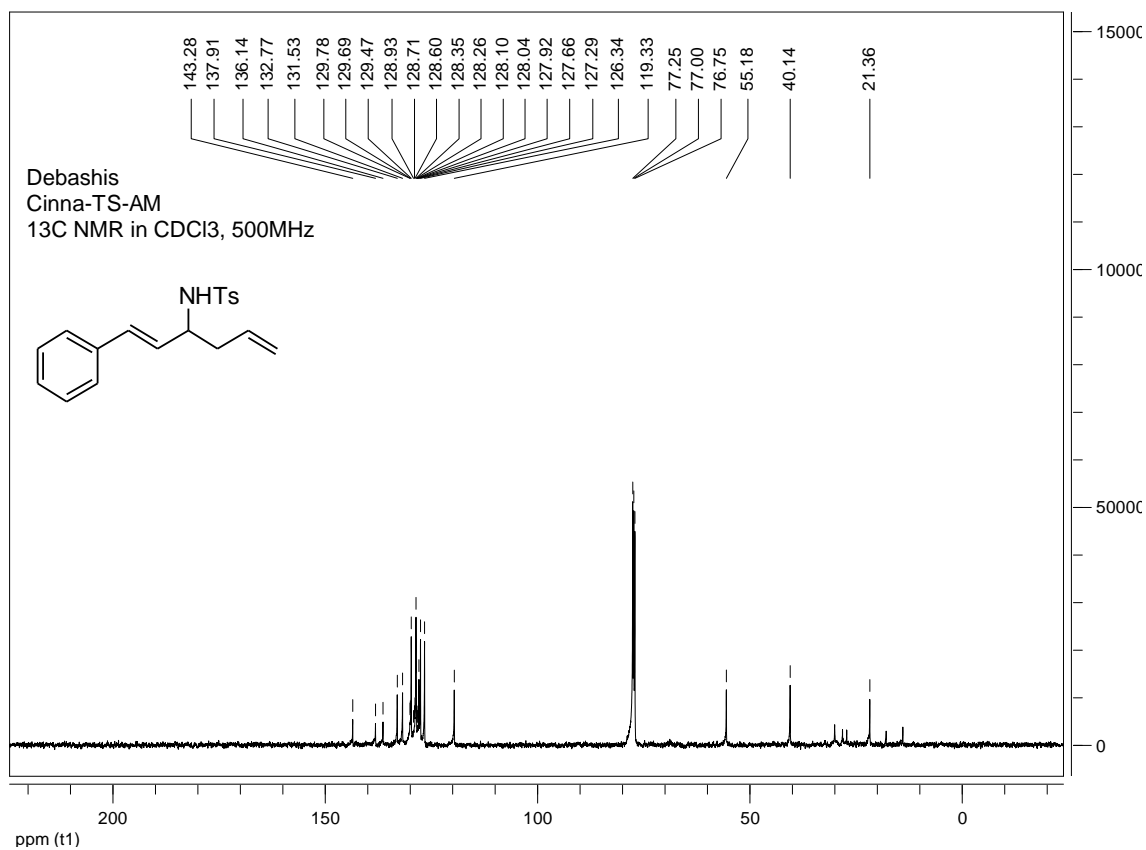

**<sup>1</sup>H and <sup>13</sup>C NMR spectra of (*E*)-*N*-(2-methyl-1-phenylhexa-1,5-dien-3-yl)-4-methylbenzenesulfonamide 2p**

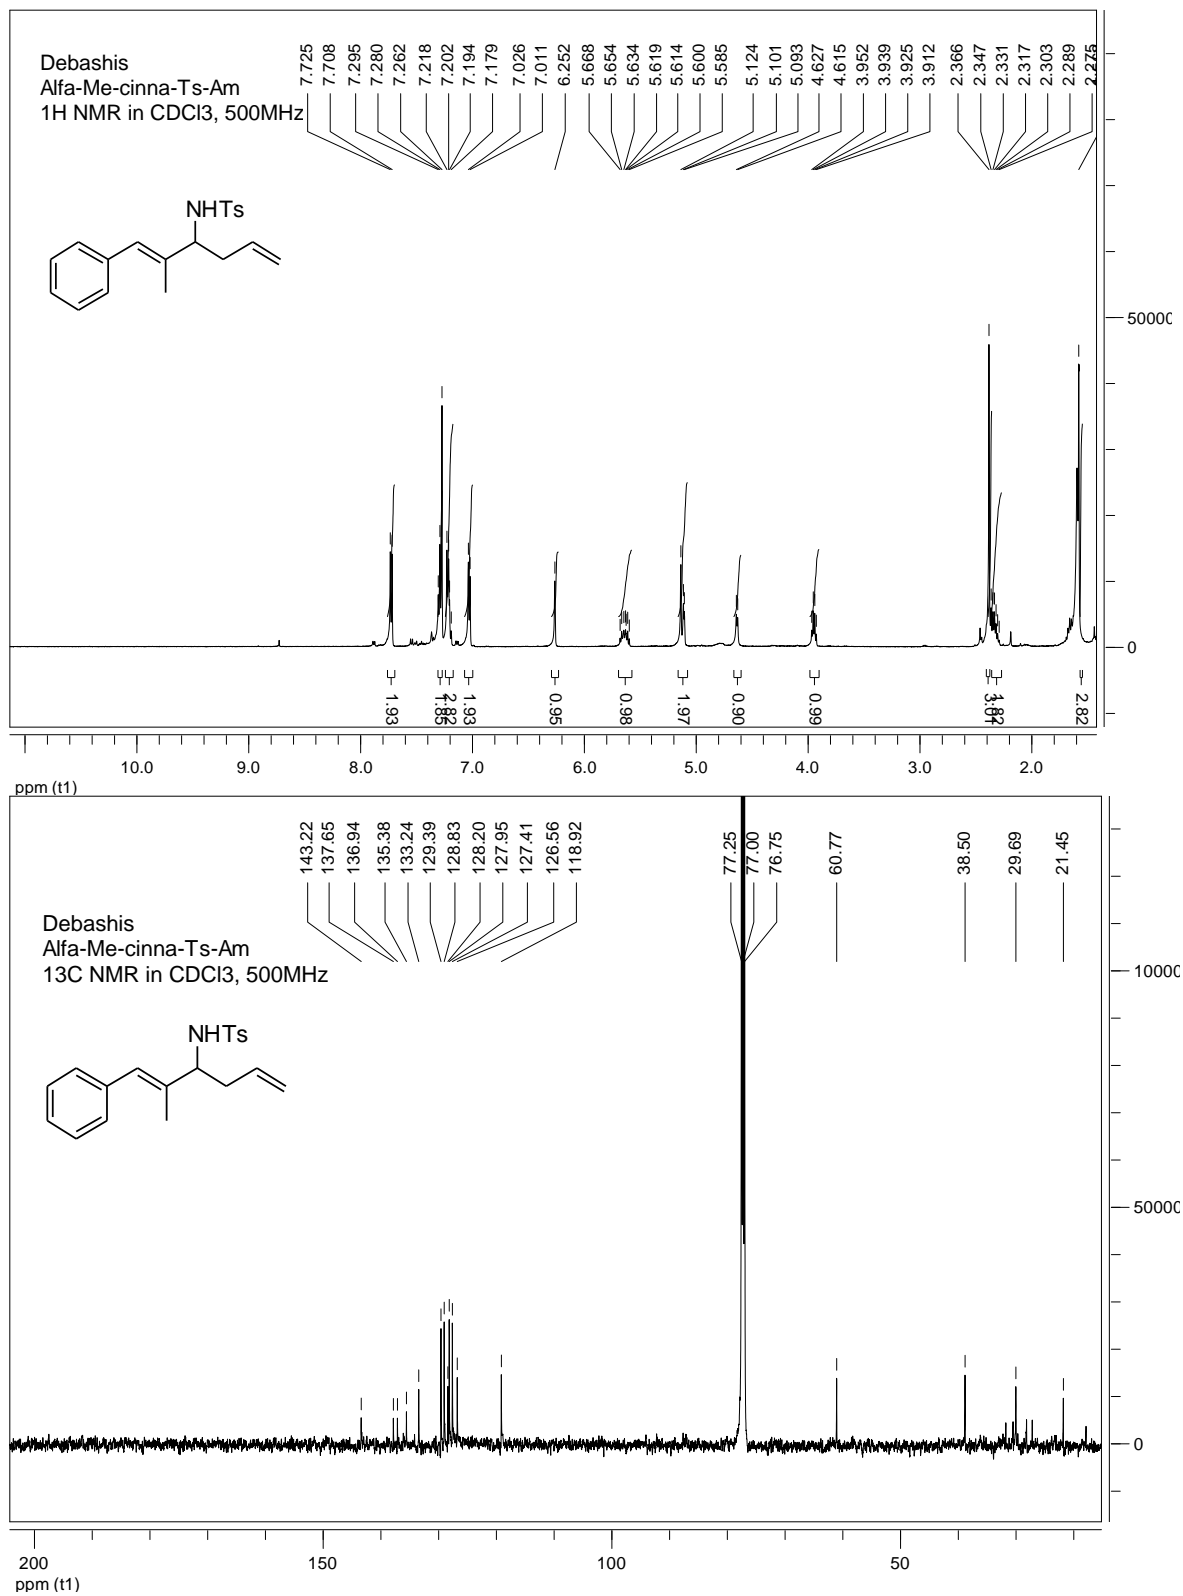

### 3-(4-methylphenylsulfonamido)-3-phenylpropanoic acid

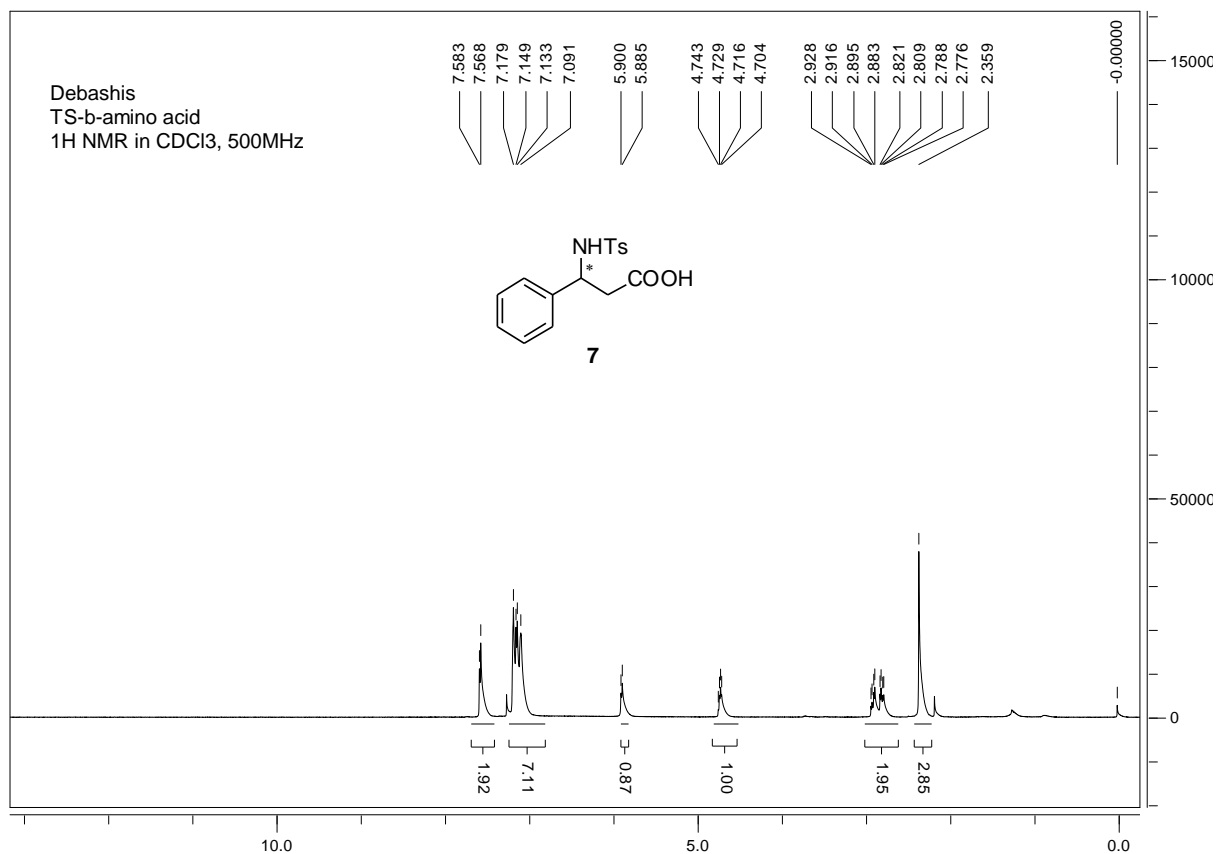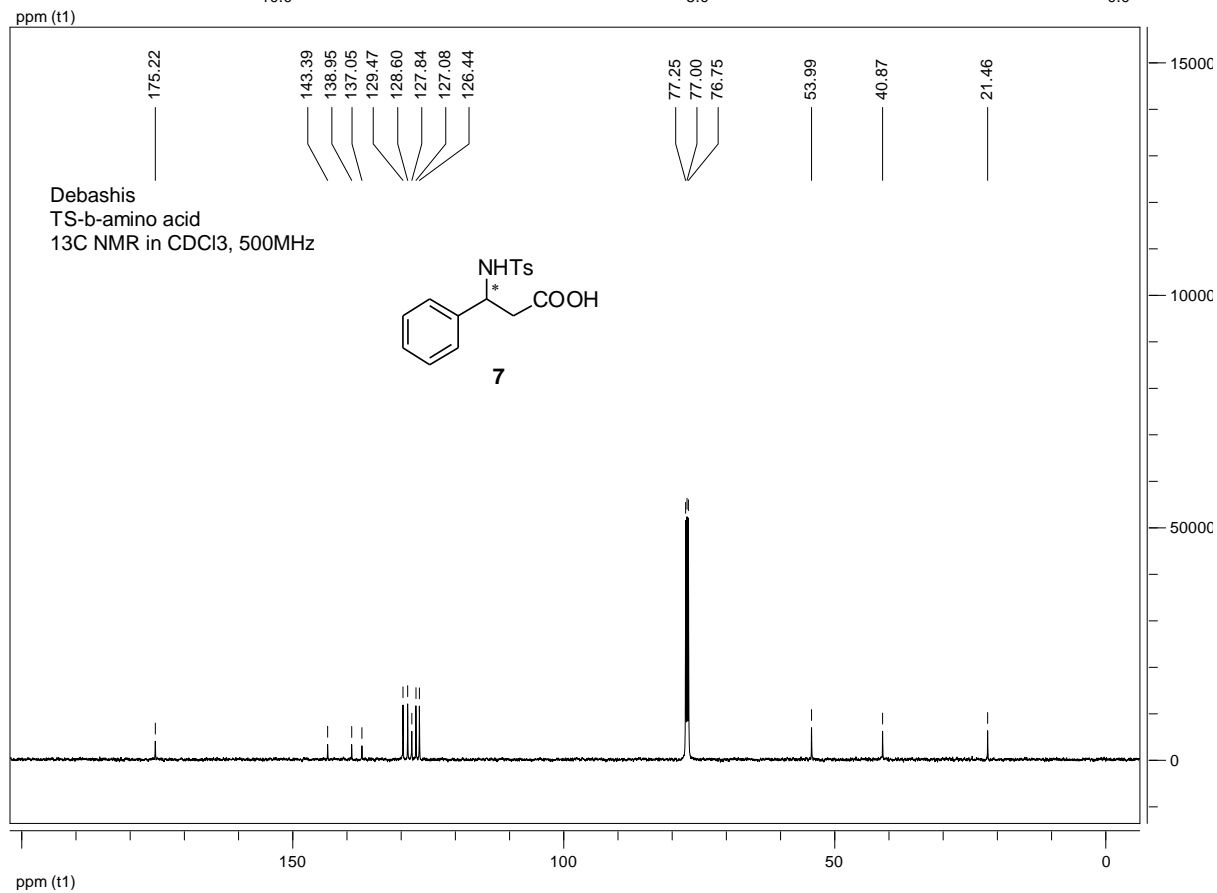

## References

1. P. Kumari, P. K. Bera, N. H. Khan, R. I. Kureshy, S. H. R. Abdi and H. C. Bajaj, *Catal. Sci. Technol.*, 2014, **4**, 563-568.
2. D. D. Perrin, W. L. F. Armarego and D. R. Perrin, *Purification of Laboratory Chemicals*; Pergamon: New York, 1981.
